# Supplementary material for: Synthesis and application of a dual chiral [2.2]paracyclophane-based N-heterocyclic carbene in enantioselective β-boration of acyclic enones
Source: Royal Society of Chemistry journal article supplement (doi:10.1039/c5ob01609f), 2015-01-01
Supplement: c5ob01609f1.pdf [file c5ob01609f1.pdf]

## Synthesis and application of dual chiral [2.2]paracyclophane-based N-heterocyclic carbene in enantioselective $\beta$ -boration of acyclic enones

Lei Wang,<sup>†a</sup> Zhen Chen,<sup>†a</sup> Manyuan Ma,<sup>b</sup> Wenzeng Duan,<sup>c</sup> Chun Song,<sup>\*b</sup> and Yudao Ma<sup>\*a</sup>

<sup>a</sup> Department of Chemistry, Shandong University, Shanda South Road No. 27, Jinan 250100, China. E-mail: ydma@sdu.edu.cn;  
Tel: +8653188361869

<sup>b</sup> School of Pharmaceutical Sciences, West Wenhua Road No. 44, Jinan 250012, China. E-mail: chunsong@sdu.edu.cn

<sup>c</sup> School of Chemistry and Chemical Engineering, Liaocheng University, Hunan Road No. 1, Liaocheng 252000, China.

<sup>†</sup> These authors contributed equally to this work.

|                                                                   |   |
|-------------------------------------------------------------------|---|
| 1. General information                                            | 2 |
| 2. Copies of <sup>1</sup> H NMR and <sup>13</sup> C NMR Spectrums | 3 |
| 3. HPLC spectra                                                   | 7 |

## 1. General information

All manipulations of oxygen- and moisture-sensitive materials were conducted with a standard Schlenk technique under a purified argon atmosphere. Solvents were reagent grade and purified by standard techniques.  $^1\text{H}$  NMR and  $^{13}\text{C}$  NMR spectra were recorded on a 300 MHz spectrometer. Chemical shifts were reported as  $\delta$  values in ppm and referenced to using tetramethylsilane as an internal. All reactions were monitored by TLC with silica gel-coated plates and visualized with a UV light at 254 nm. Optical rotations were reported as follows:  $[\alpha]_{\text{D}}^{\text{T}}$  ( $c = \text{g}/100 \text{ mL}$ , solvent).

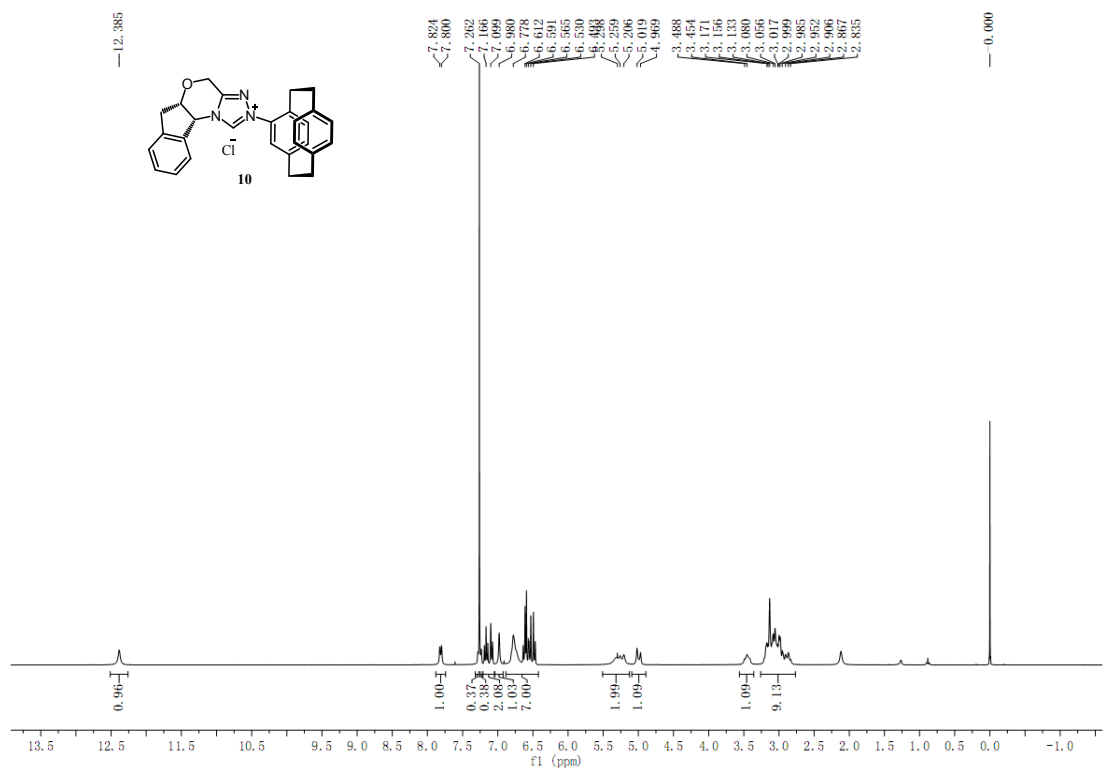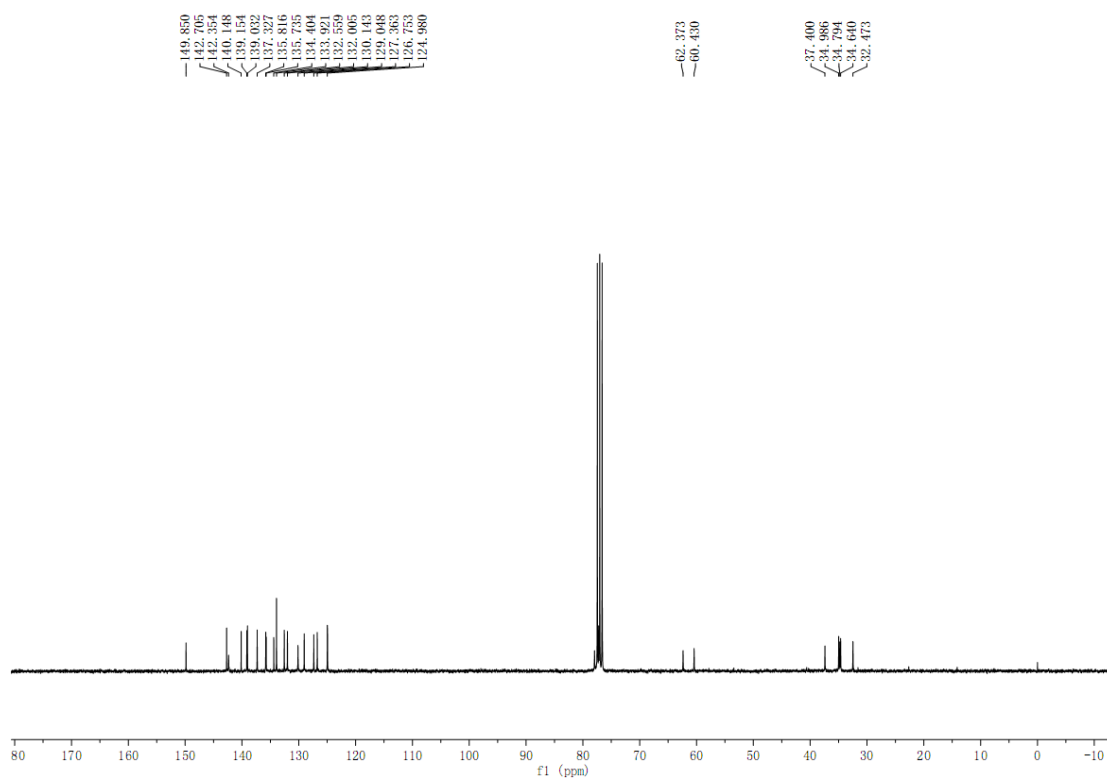

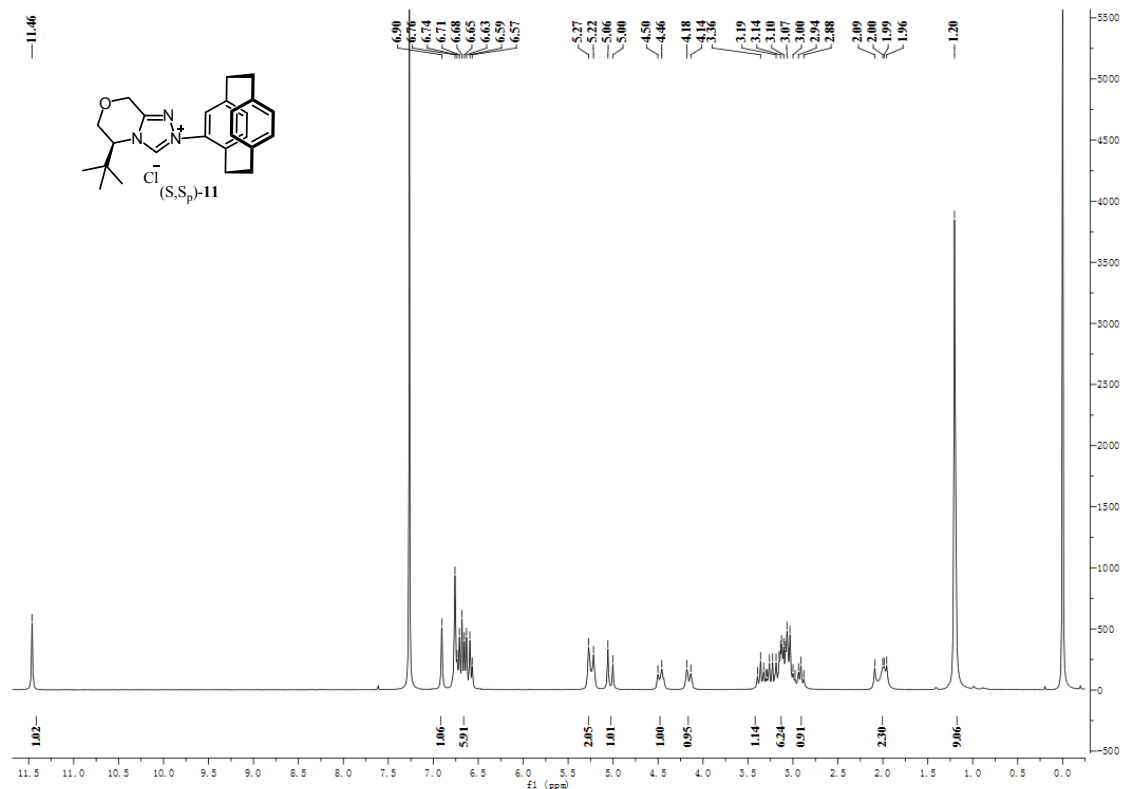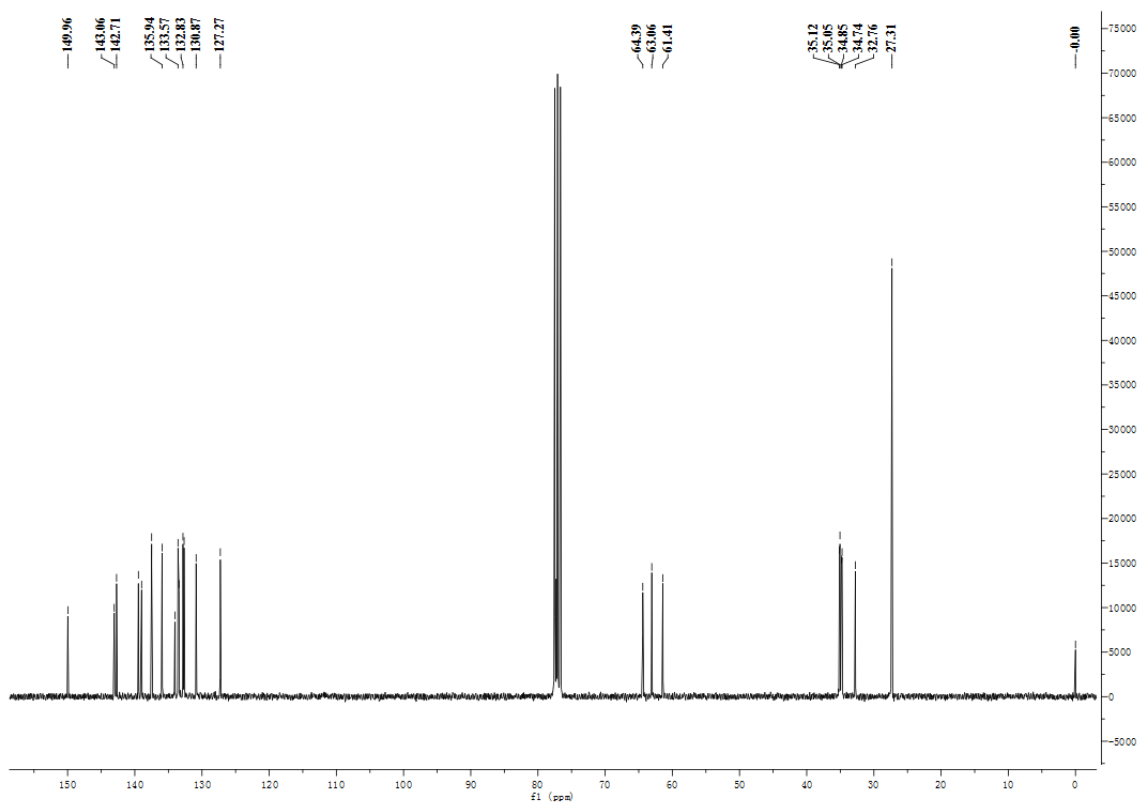

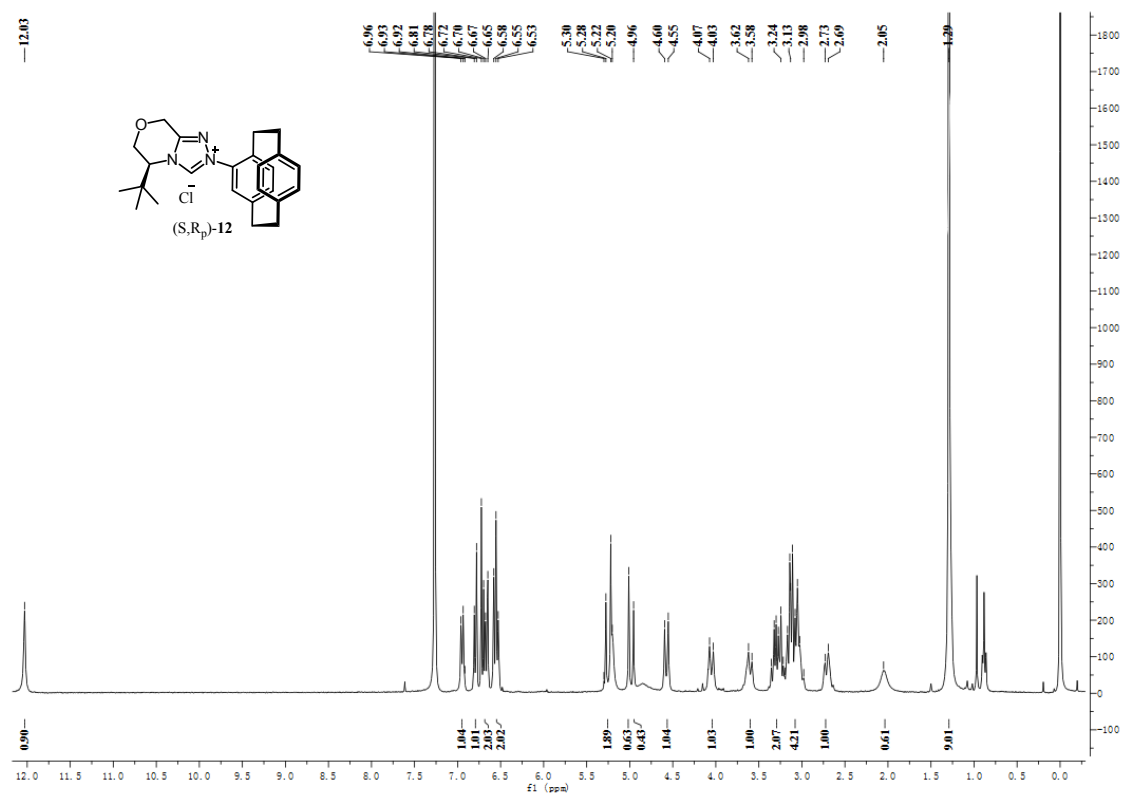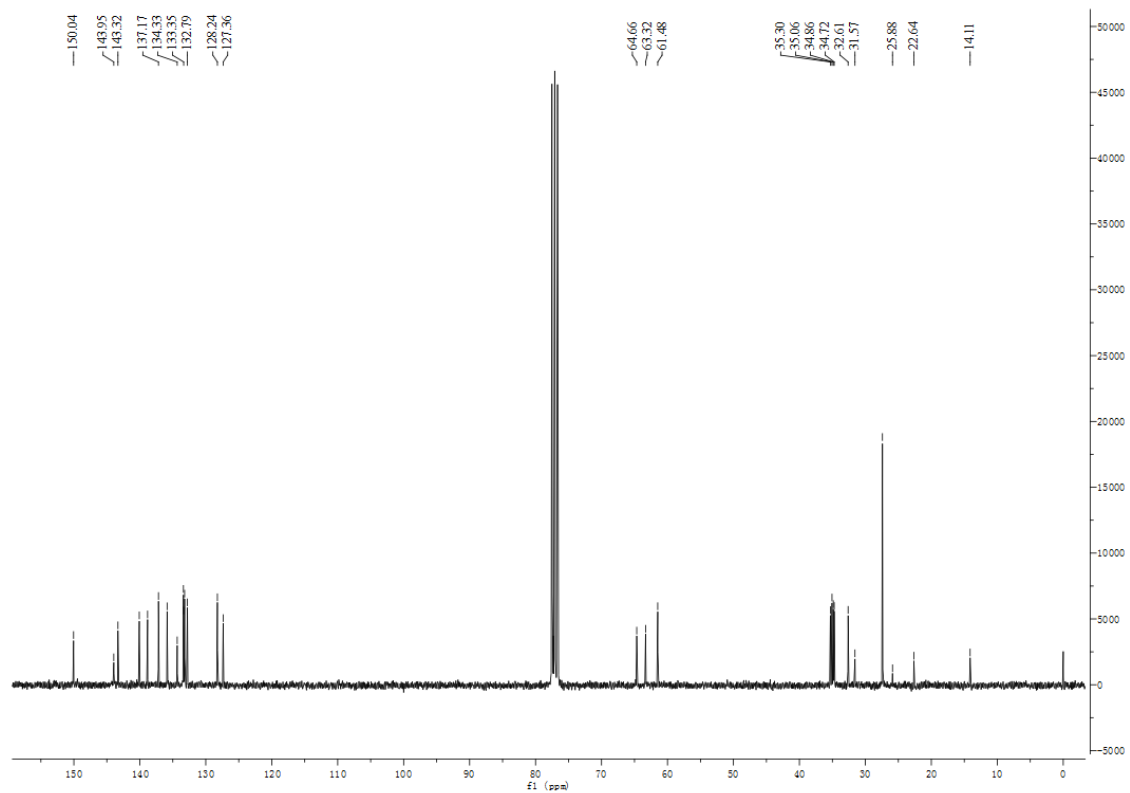

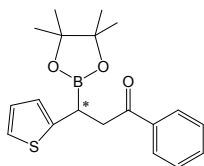

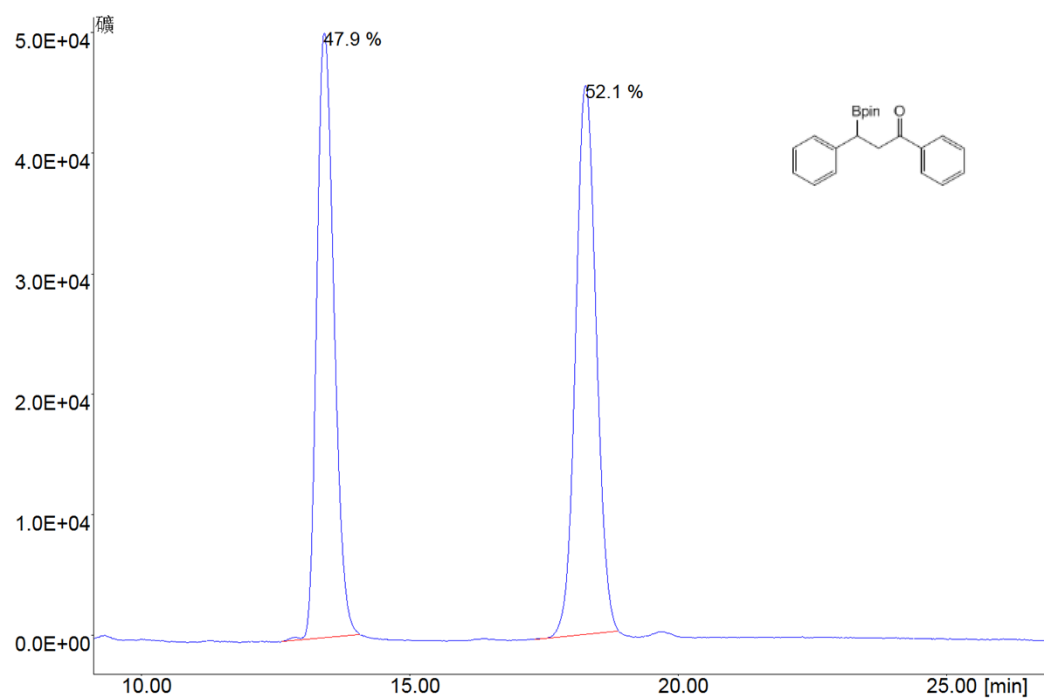

| # | Name | RT     | Height | Area [Sec]  | %Area  |
|---|------|--------|--------|-------------|--------|
| 1 |      | 13.403 | 50141  | 1095932.329 | 47.907 |
| 2 |      | 18.270 | 45514  | 1191707.828 | 52.093 |

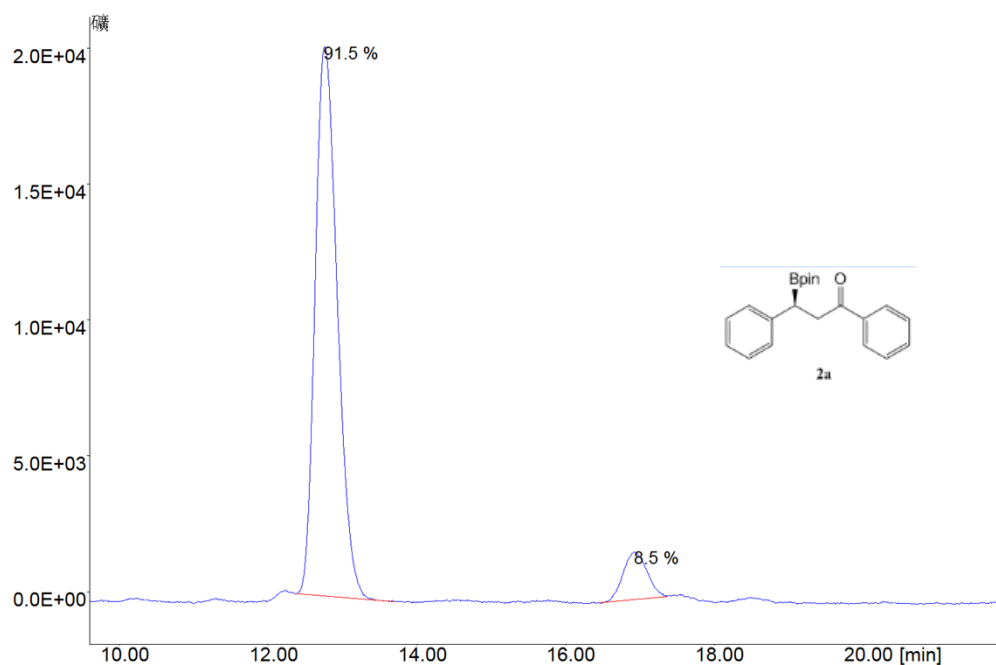

| # | Name | RT     | Height | Area [Sec] | %Area  |
|---|------|--------|--------|------------|--------|
| 1 |      | 12.753 | 20208  | 410798.178 | 91.453 |
| 2 |      | 16.917 | 1748   | 38394.552  | 8.547  |

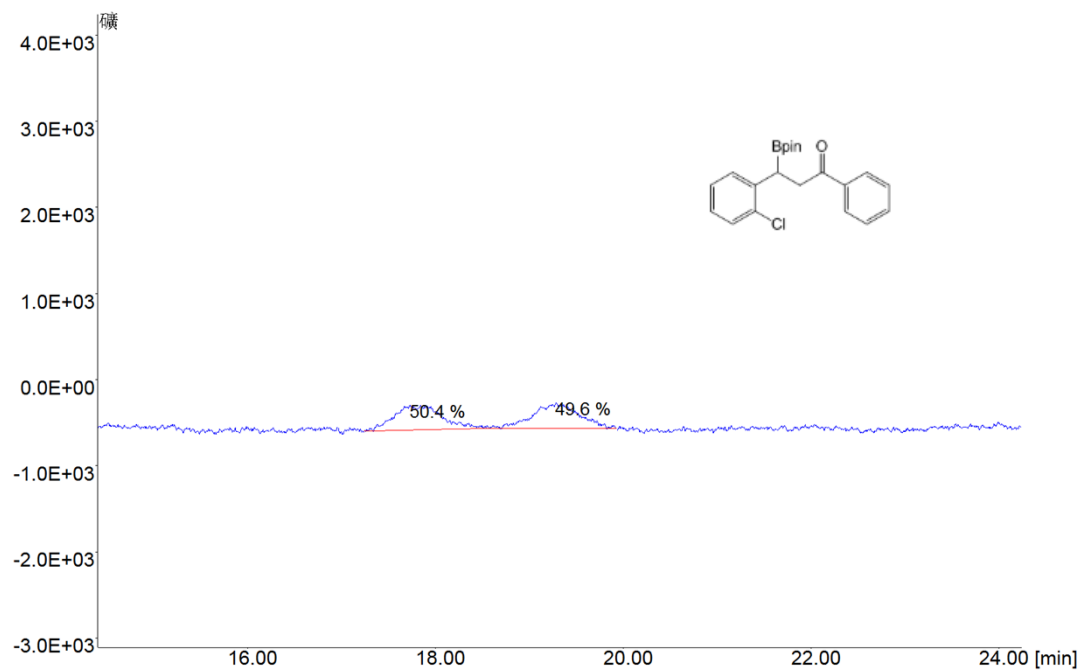

| # | Name | RT     | Height | Area[ Sec] | %Area  |
|---|------|--------|--------|------------|--------|
| 1 |      | 17.727 | 289    | 10143.509  | 50.360 |
| 2 |      | 19.283 | 296    | 9998.600   | 49.640 |

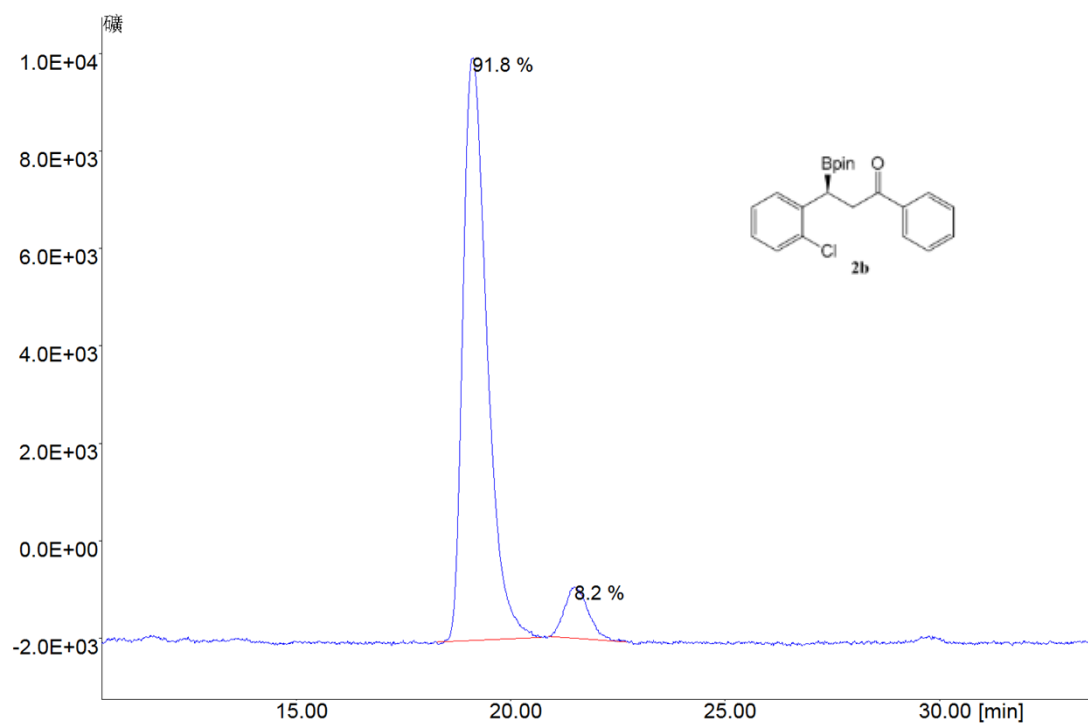

| # | Name | RT     | Height | Area[ Sec] | %Area  |
|---|------|--------|--------|------------|--------|
| 1 |      | 19.110 | 11958  | 459509.325 | 91.842 |
| 2 |      | 21.493 | 1065   | 40818.608  | 8.158  |



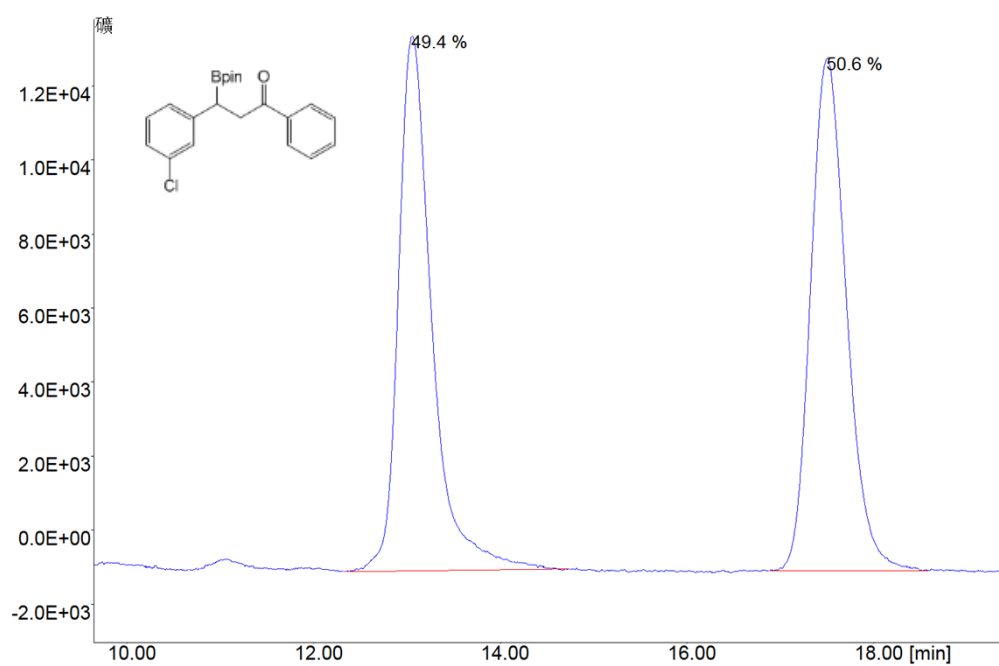

| # | Name | RT     | Height | Area[Sec]  | %Area  |
|---|------|--------|--------|------------|--------|
| 1 |      | 13.053 | 14442  | 356145.478 | 49.441 |
| 2 |      | 17.500 | 13841  | 364197.401 | 50.559 |

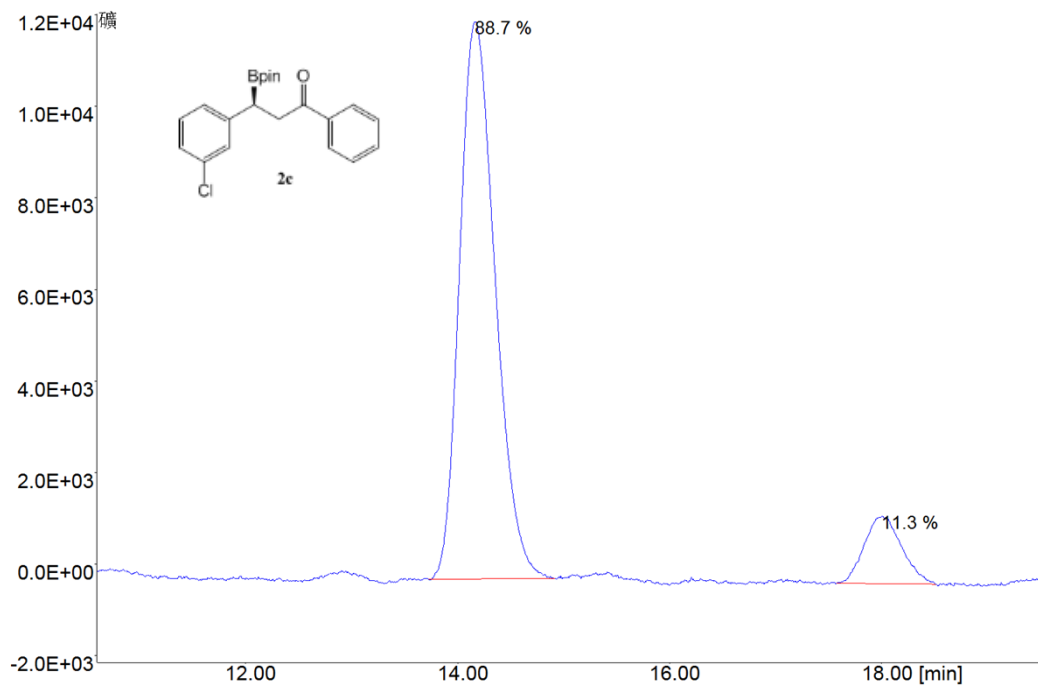

| # | Name | RT     | Height | Area[ Sec] | %Area  |
|---|------|--------|--------|------------|--------|
| 1 |      | 14.163 | 12166  | 280614.047 | 88.737 |
| 2 |      | 17.997 | 1468   | 35618.416  | 11.263 |

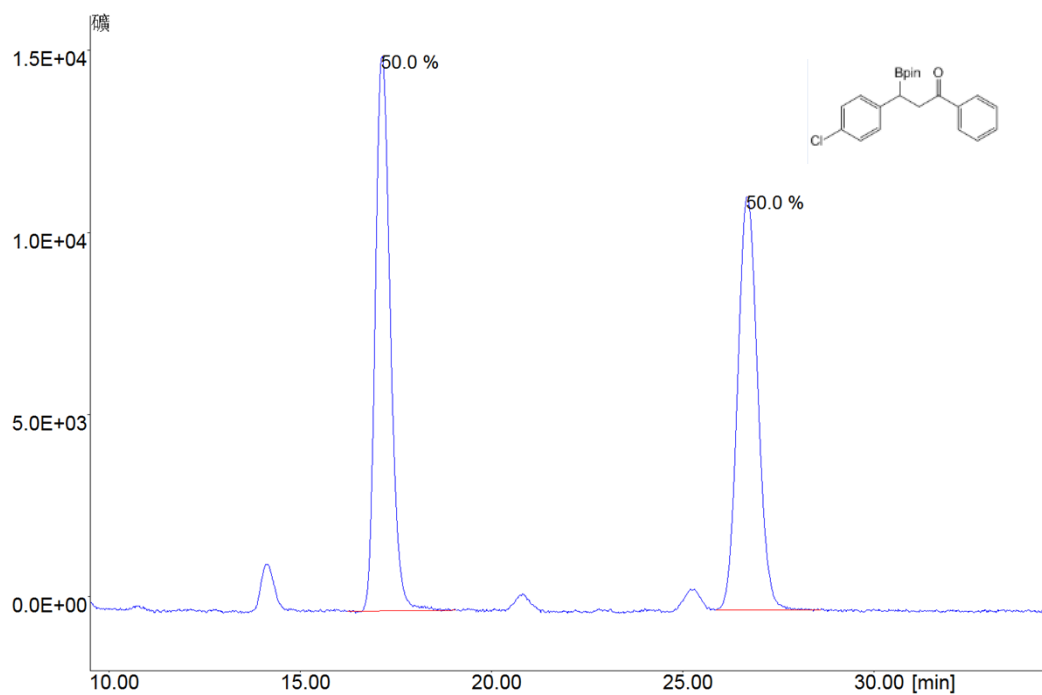

| # | Name | RT     | Height | Area[Sec]  | %Area  |
|---|------|--------|--------|------------|--------|
| 1 |      | 17.137 | 15228  | 405261.043 | 50.022 |
| 2 |      | 26.670 | 11341  | 404897.602 | 49.978 |

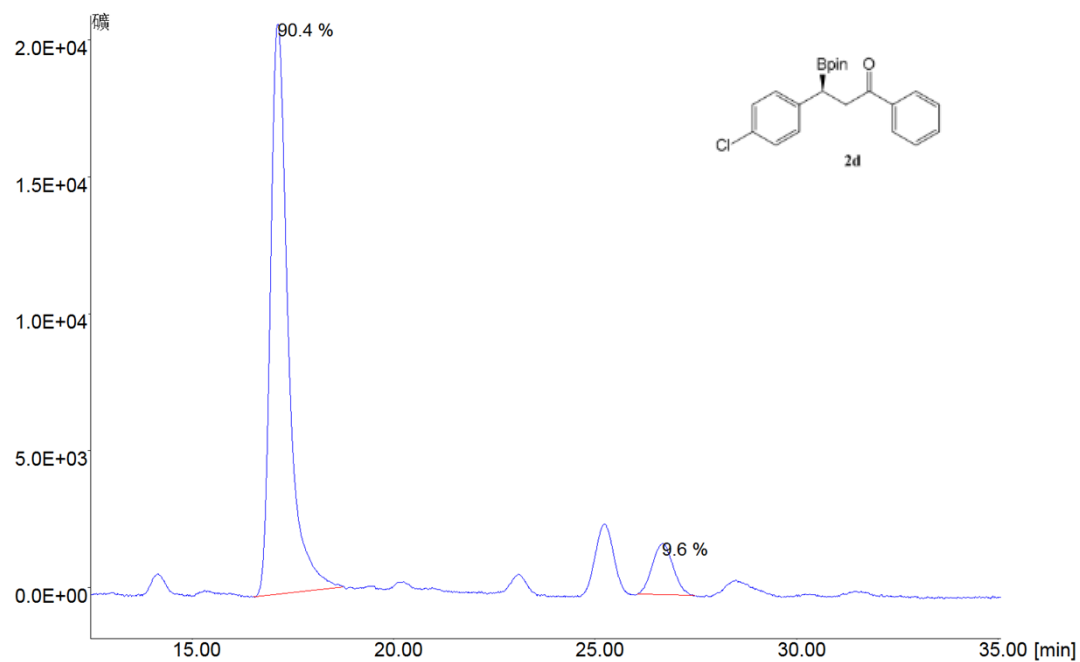

| # | Name | RT     | Height | Area[Sec]  | %Area  |
|---|------|--------|--------|------------|--------|
| 1 |      | 17.123 | 20837  | 620608.130 | 90.381 |
| 2 |      | 26.667 | 1886   | 66047.431  | 9.619  |

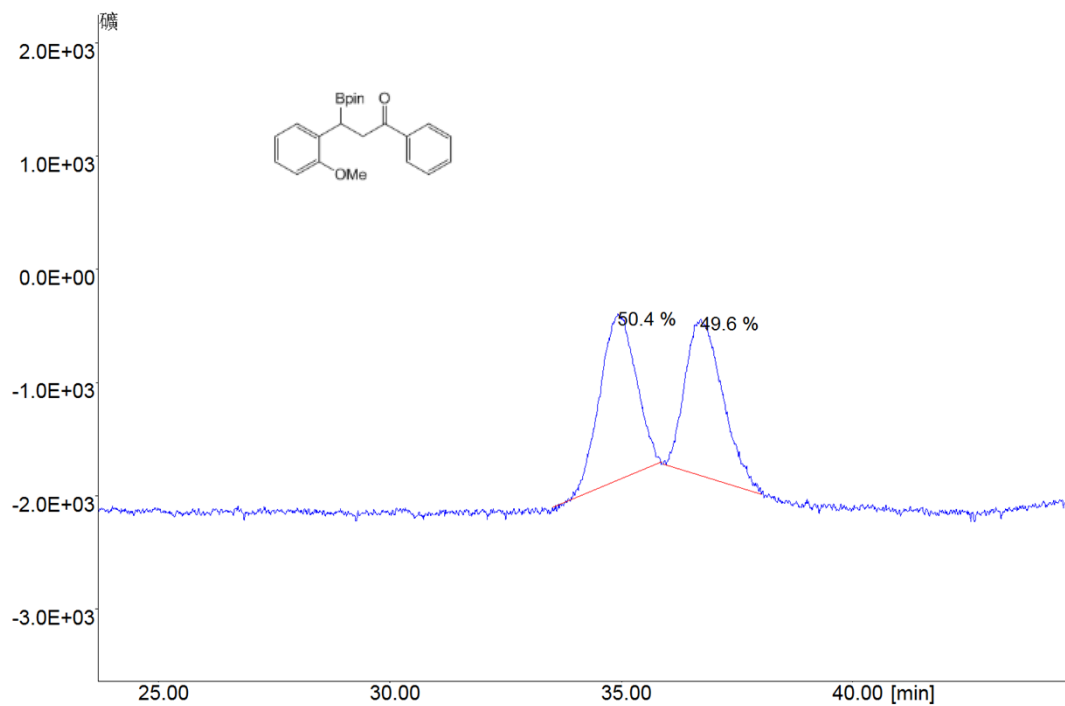

| # | Name | RT     | Height | Area[Sec] | %Area  |
|---|------|--------|--------|-----------|--------|
| 1 |      | 34.930 | 1475   | 80046.766 | 50.378 |
| 2 |      | 36.723 | 1401   | 78844.839 | 49.622 |

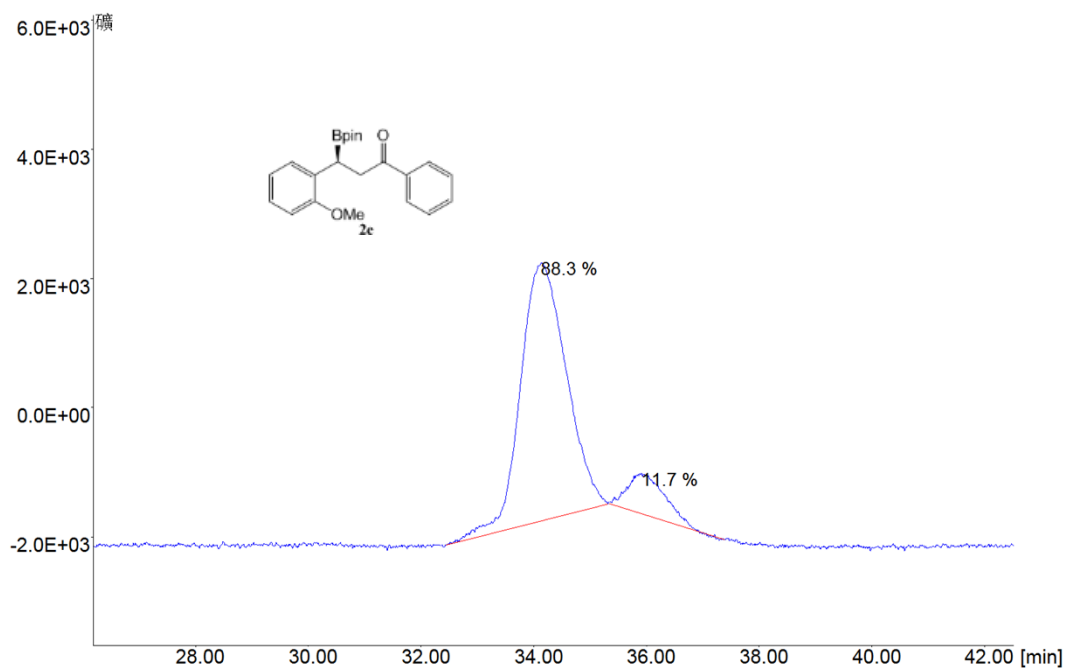

| # | Name | RT     | Height | Area[Sec]  | %Area  |
|---|------|--------|--------|------------|--------|
| 1 |      | 34.133 | 4006   | 224402.113 | 88.325 |
| 2 |      | 35.917 | 624    | 29661.116  | 11.675 |

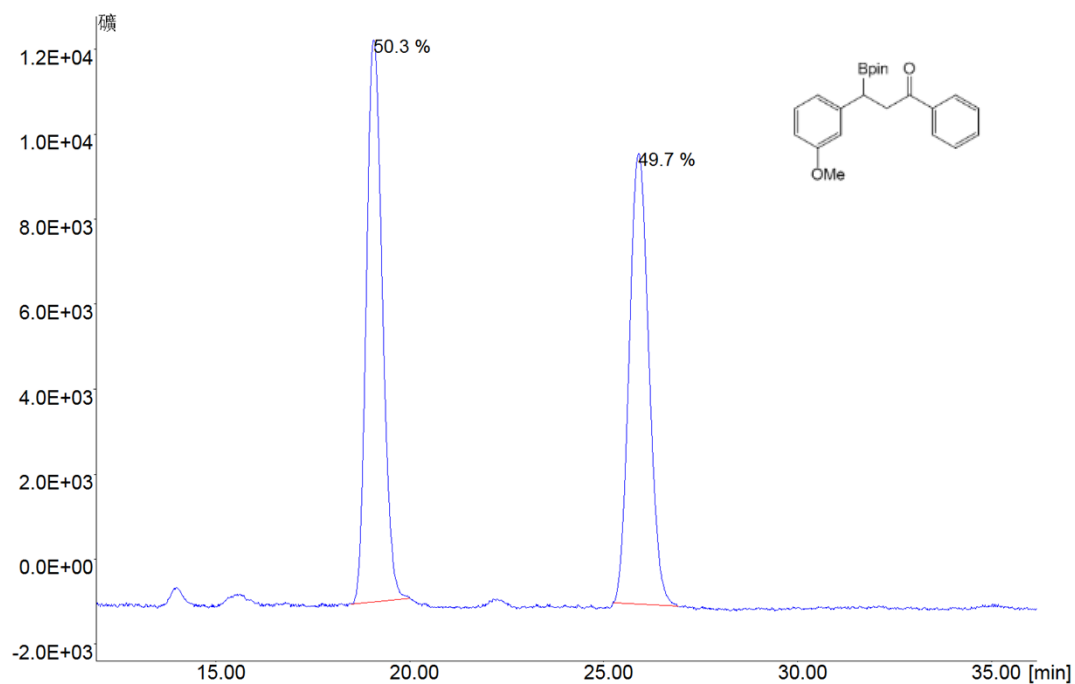

| # | Name | RT     | Height | Area[Sec]  | %Area  |
|---|------|--------|--------|------------|--------|
| 1 |      | 19.063 | 13229  | 370581.373 | 50.290 |
| 2 |      | 25.893 | 10607  | 366311.096 | 49.710 |

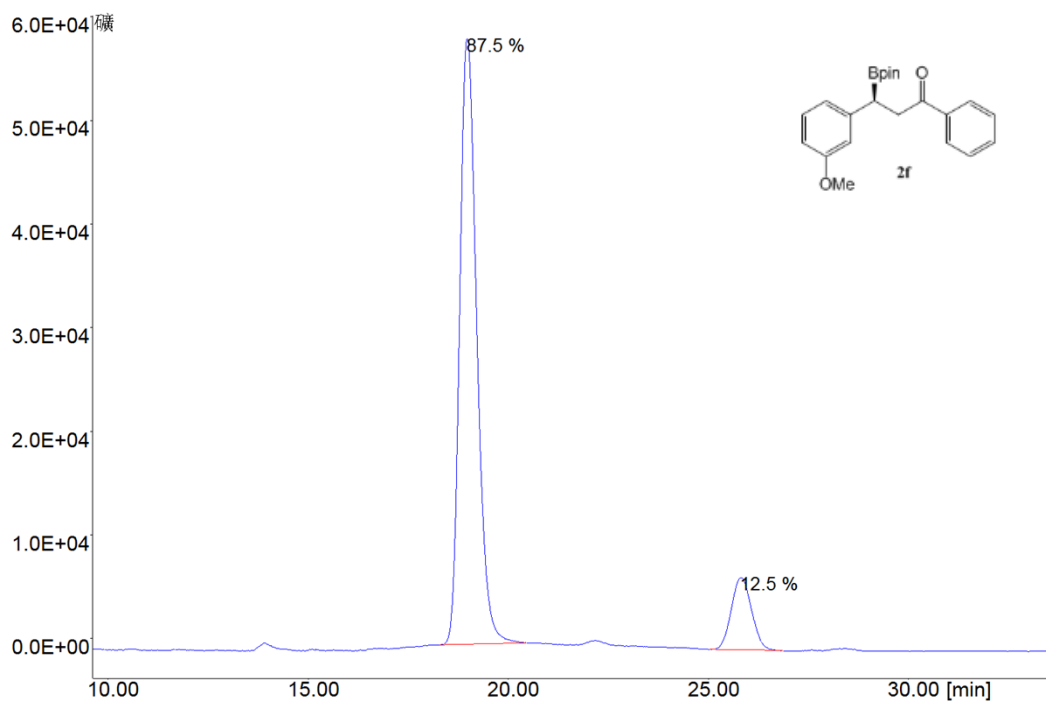

| # | Name | RT     | Height | Area[Sec]   | %Area  |
|---|------|--------|--------|-------------|--------|
| 1 |      | 18.963 | 58393  | 1687053.226 | 87.476 |
| 2 |      | 25.800 | 6964   | 241528.752  | 12.524 |

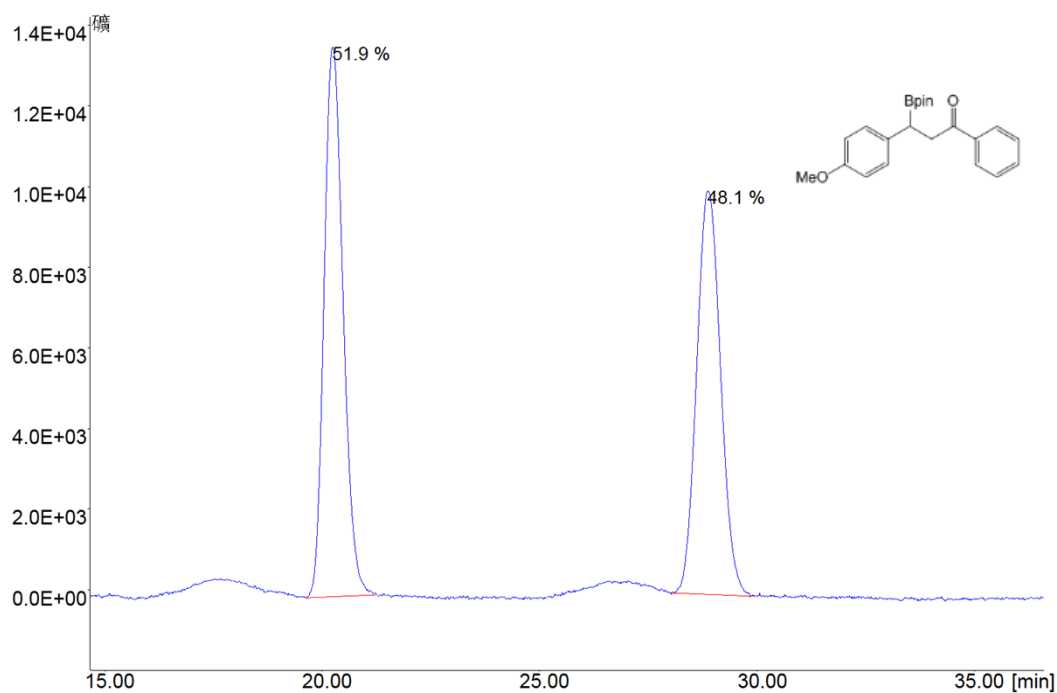

| # | Name | RT     | Height | Area[Sec]  | %Area  |
|---|------|--------|--------|------------|--------|
| 1 |      | 20.237 | 13631  | 405115.200 | 51.859 |
| 2 |      | 28.857 | 9997   | 376067.407 | 48.141 |

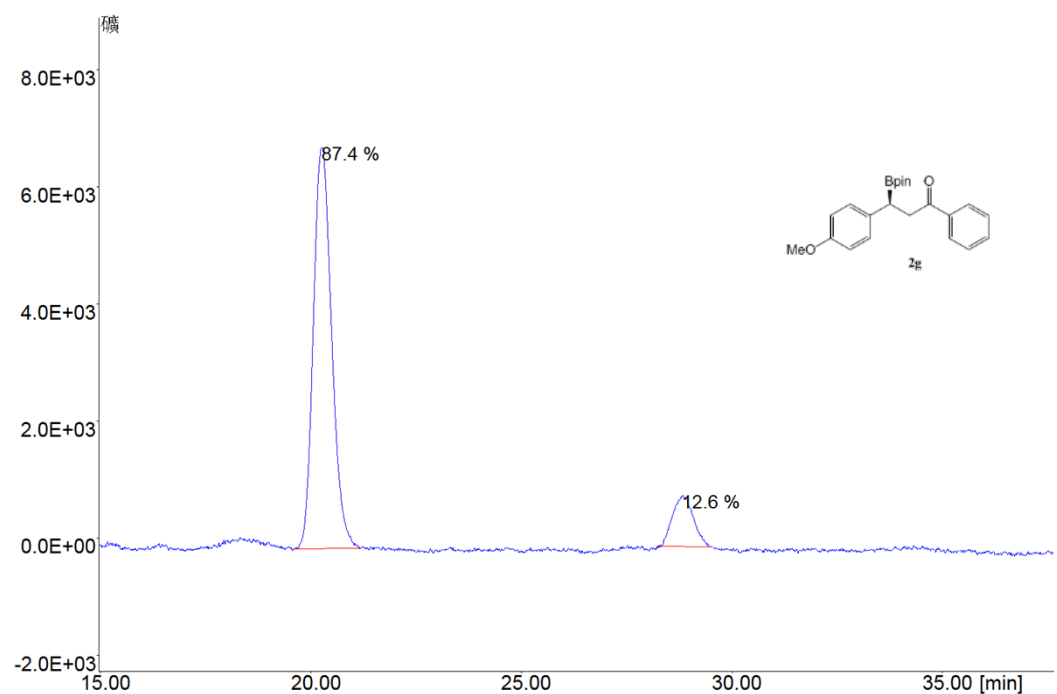

| # | Name | RT     | Height | Area[Sec]  | %Area  |
|---|------|--------|--------|------------|--------|
| 1 |      | 20.263 | 6856   | 202070.425 | 87.363 |
| 2 |      | 28.823 | 870    | 29230.583  | 12.637 |

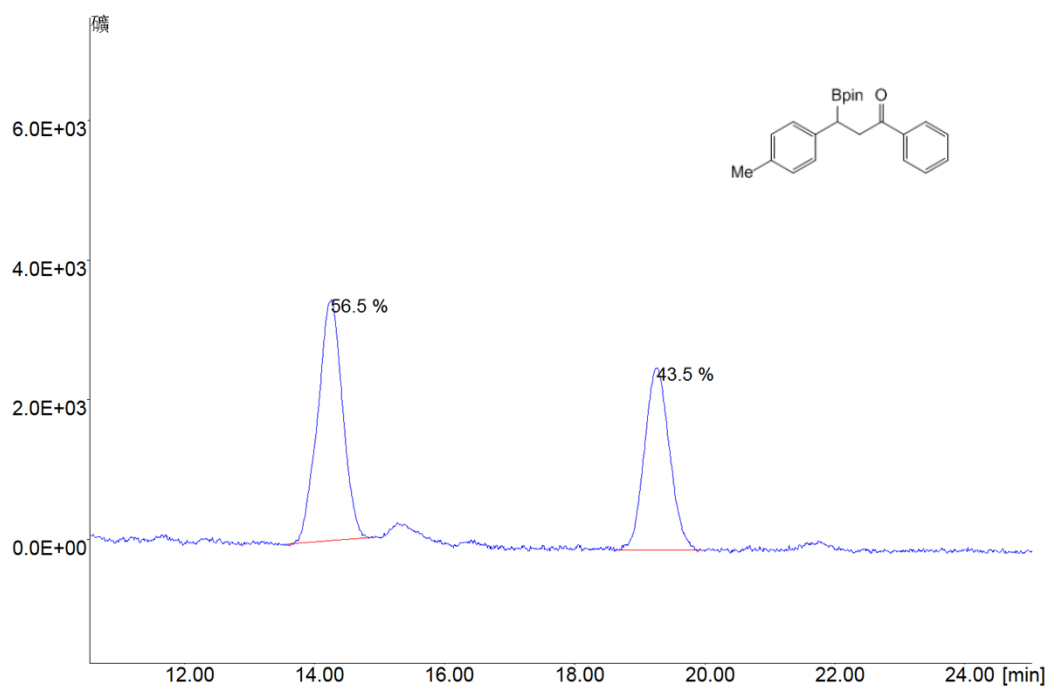

| # | Name | RT     | Height | Area[Sec] | %Area  |
|---|------|--------|--------|-----------|--------|
| 1 |      | 14.253 | 3459   | 90215.405 | 56.497 |
| 2 |      | 19.263 | 2615   | 69467.000 | 43.503 |

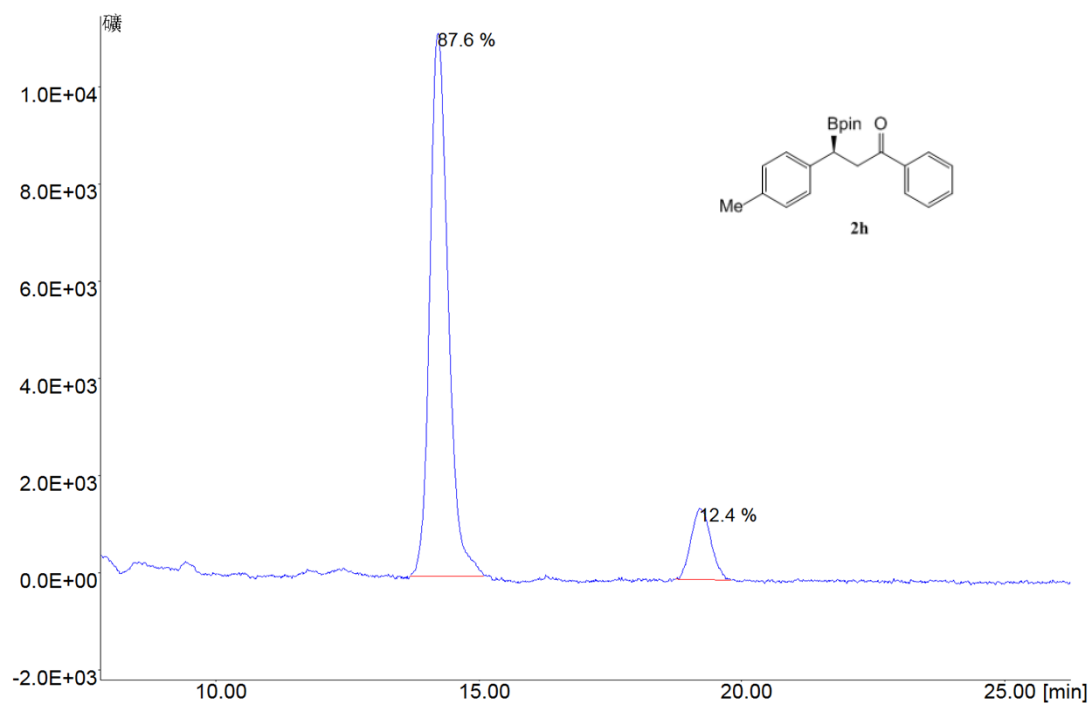

| # | Name | RT     | Height | Area[Sec]  | %Area  |
|---|------|--------|--------|------------|--------|
| 1 |      | 14.220 | 11166  | 264608.700 | 87.639 |
| 2 |      | 19.197 | 1458   | 37322.361  | 12.361 |

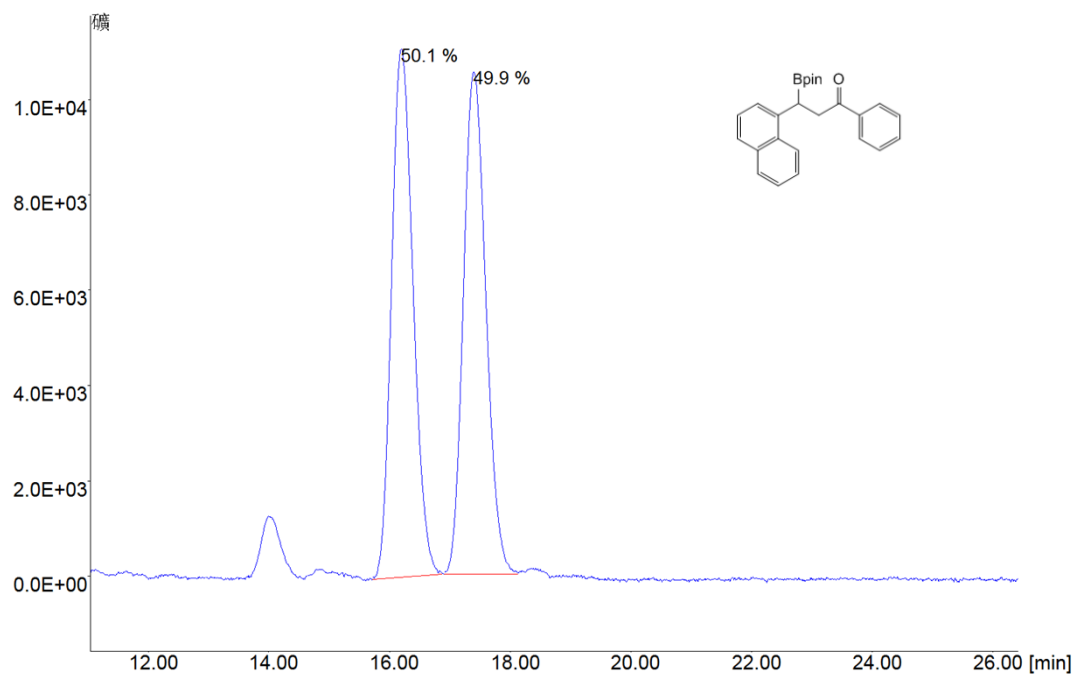

| # | Name | RT     | Height | Area[Sec]  | %Area  |
|---|------|--------|--------|------------|--------|
| 1 |      | 16.187 | 11080  | 269407.210 | 50.146 |
| 2 |      | 17.393 | 10545  | 267841.200 | 49.854 |

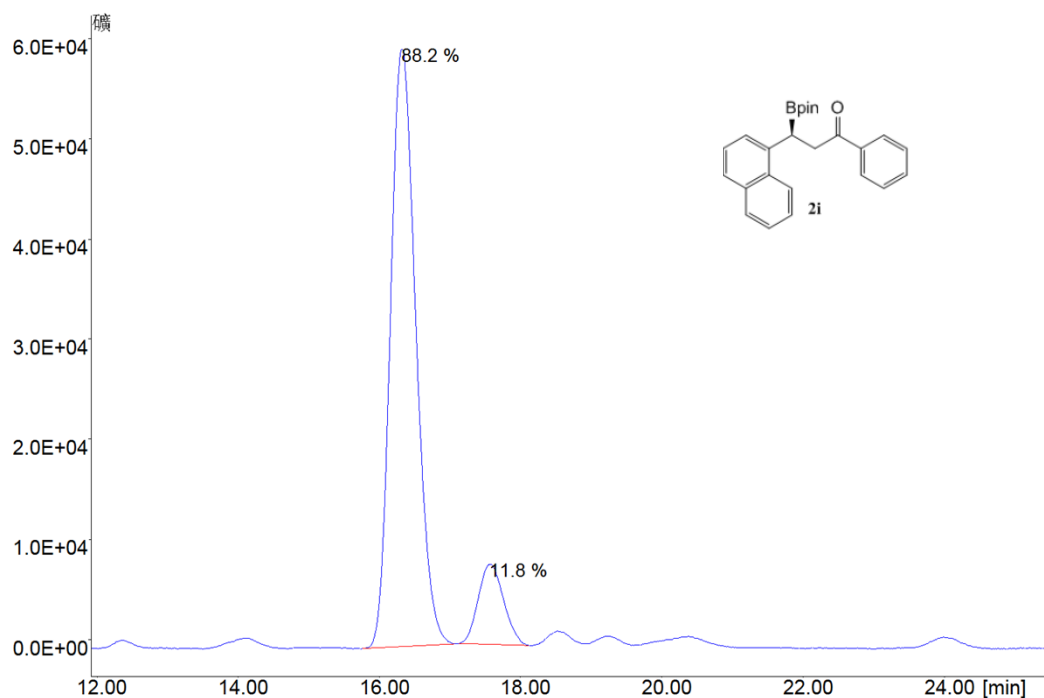

| # | Name | RT     | Height | Area[Sec]   | %Area  |
|---|------|--------|--------|-------------|--------|
| 1 |      | 16.317 | 59701  | 1459492.889 | 88.172 |
| 2 |      | 17.563 | 8008   | 195787.500  | 11.828 |

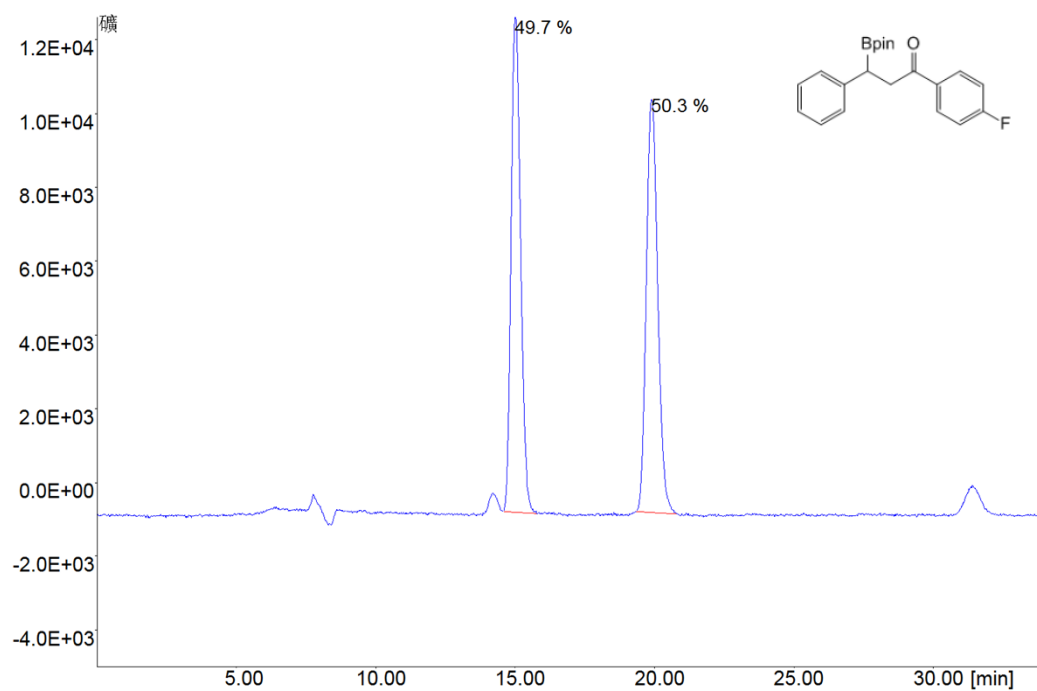

| # | Name | RT     | Height | Area[Sec]  | %Area  |
|---|------|--------|--------|------------|--------|
| 1 |      | 14.993 | 13411  | 305529.400 | 49.717 |
| 2 |      | 19.887 | 11205  | 309008.941 | 50.283 |

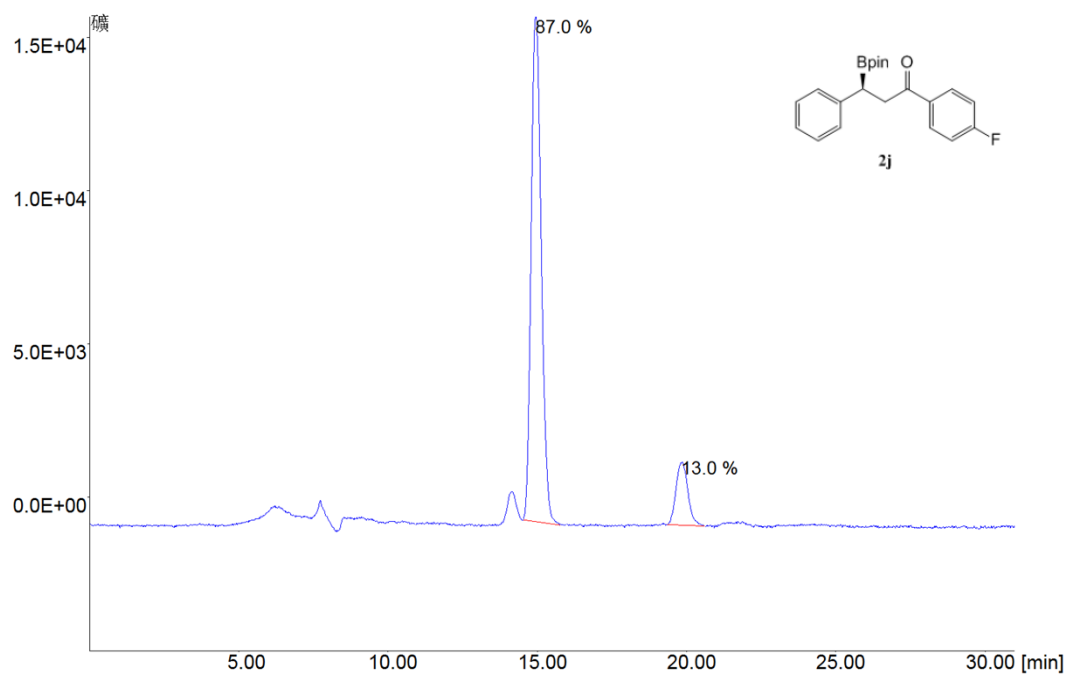

| # | Name | RT     | Height | Area[Sec]  | %Area  |
|---|------|--------|--------|------------|--------|
| 1 |      | 14.940 | 16454  | 374140.600 | 86.965 |
| 2 |      | 19.840 | 2055   | 56077.410  | 13.035 |



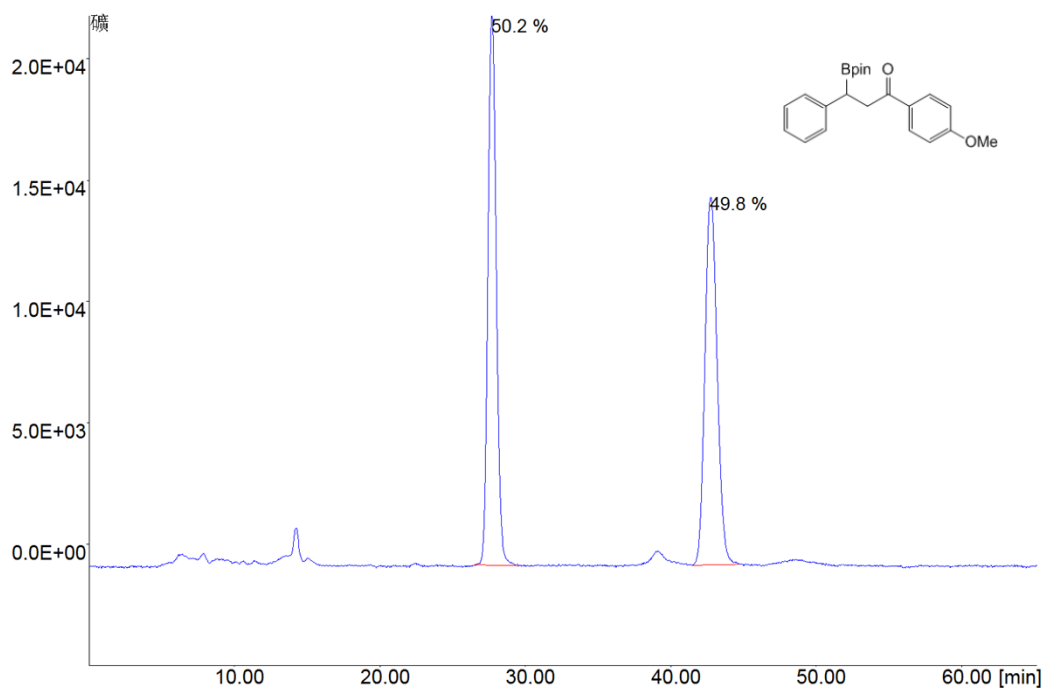

| # | Name | RT     | Height | Area[Sec]  | %Area  |
|---|------|--------|--------|------------|--------|
| 1 |      | 27.687 | 22618  | 860388.749 | 50.173 |
| 2 |      | 42.733 | 15135  | 854445.309 | 49.827 |

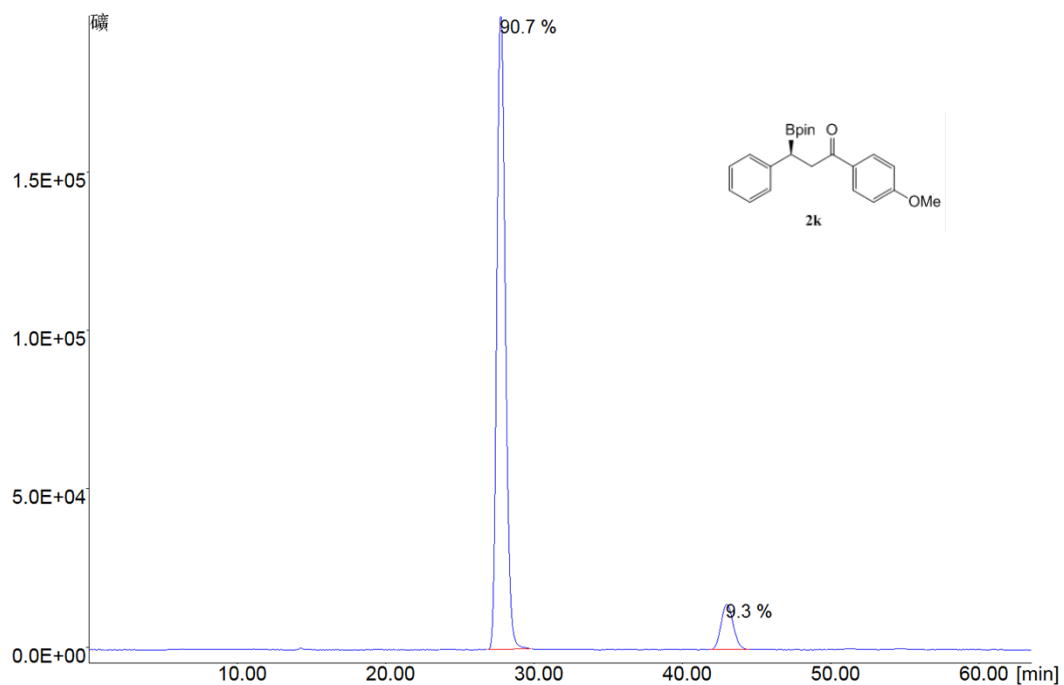

| # | Name | RT     | Height | Area[Sec]   | %Area  |
|---|------|--------|--------|-------------|--------|
| 1 |      | 27.740 | 200017 | 7637443.298 | 90.672 |
| 2 |      | 42.957 | 14113  | 785681.400  | 9.328  |

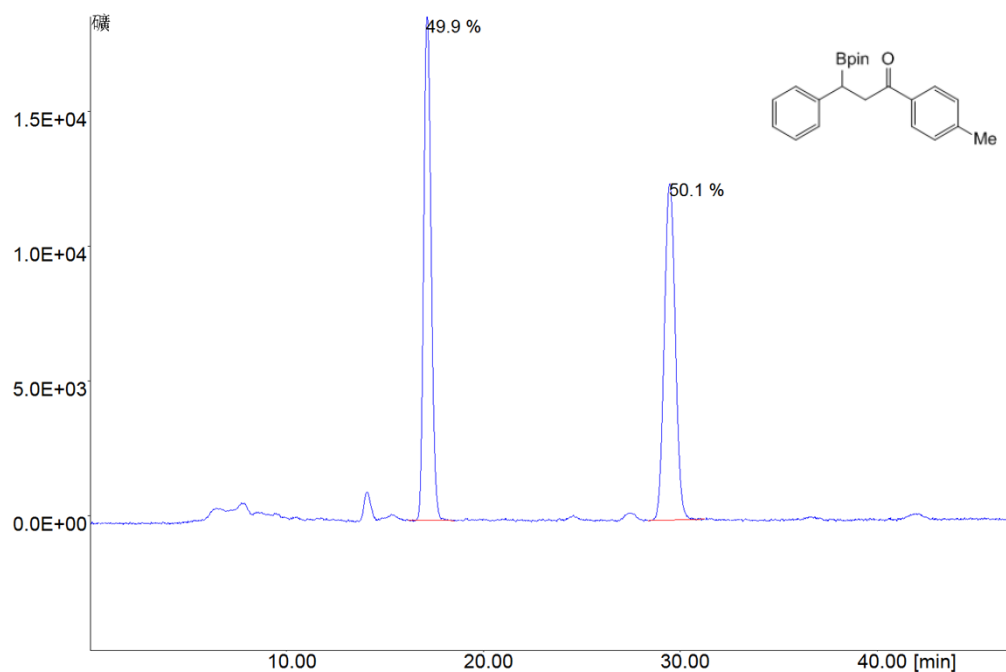

| # | Name | RT     | Height | Area[Sec]  | %Area  |
|---|------|--------|--------|------------|--------|
| 1 |      | 17.117 | 18682  | 466942.082 | 49.929 |
| 2 |      | 29.453 | 12481  | 468265.306 | 50.071 |

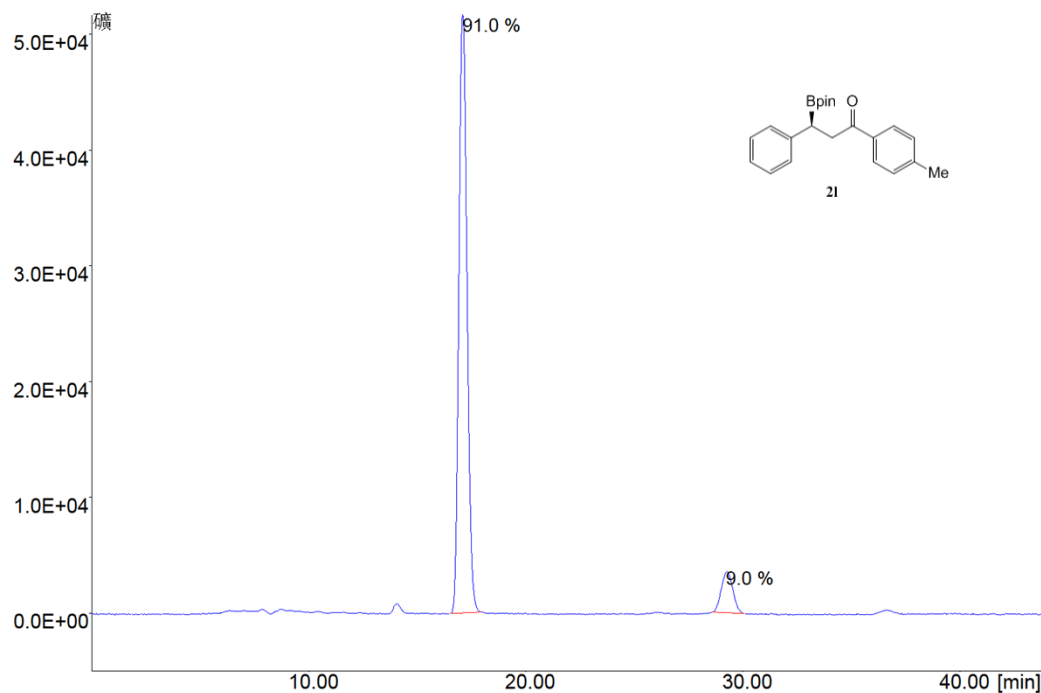

| # | Name | RT     | Height | Area[Sec]   | %Area  |
|---|------|--------|--------|-------------|--------|
| 1 |      | 17.090 | 51657  | 1280412.204 | 91.021 |
| 2 |      | 29.247 | 3537   | 126306.992  | 8.979  |

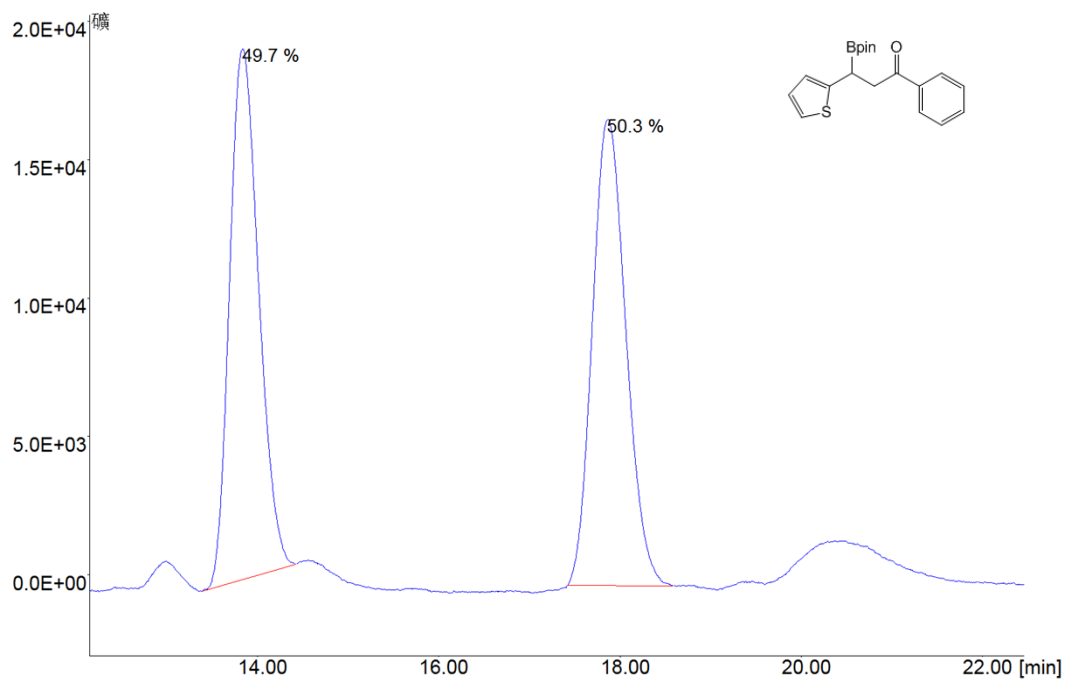

| # | Name | RT     | Height | Area[Sec]  | %Area  |
|---|------|--------|--------|------------|--------|
| 1 |      | 13.833 | 19184  | 422425.233 | 49.662 |
| 2 |      | 17.863 | 16847  | 428166.800 | 50.338 |

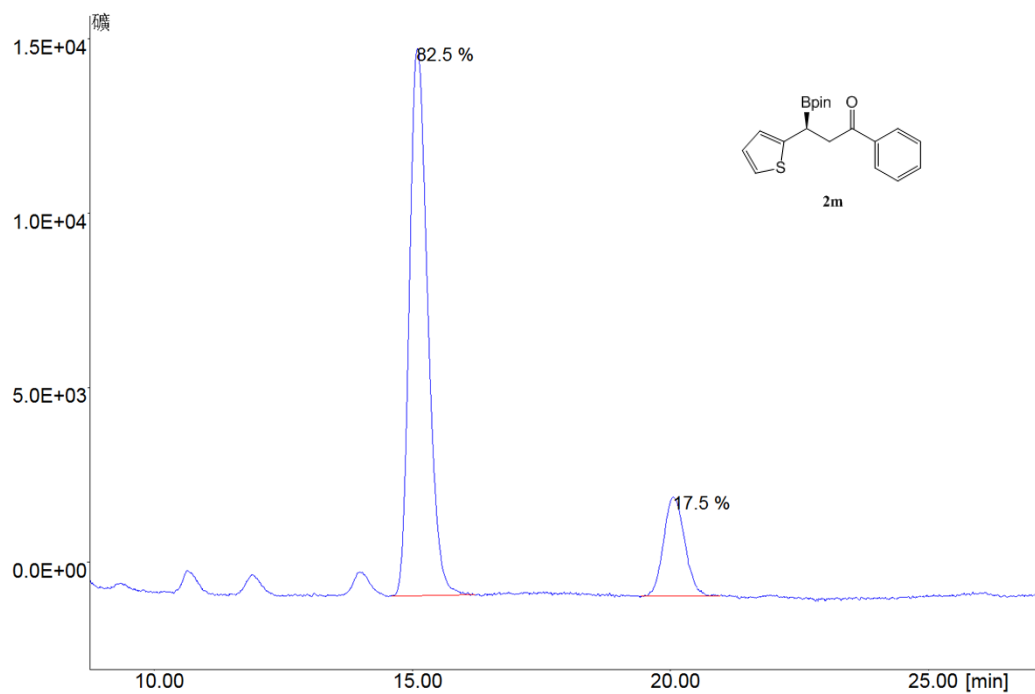

| # | Name | RT     | Height | Area[Sec]  | %Area  |
|---|------|--------|--------|------------|--------|
| 1 |      | 15.090 | 15682  | 378474.375 | 82.494 |
| 2 |      | 20.053 | 2846   | 80318.433  | 17.506 |

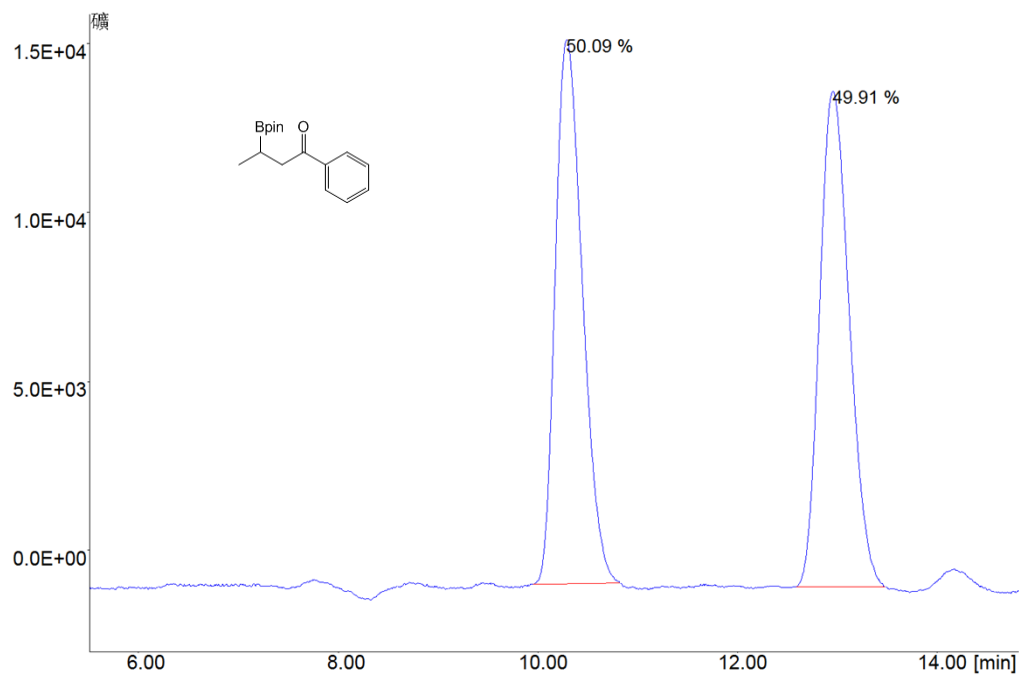

| # | Name | RT     | Height | Area[Sec]  | %Area  |
|---|------|--------|--------|------------|--------|
| 1 |      | 10.287 | 16115  | 300213.000 | 50.093 |
| 2 |      | 12.953 | 14679  | 299093.800 | 49.907 |

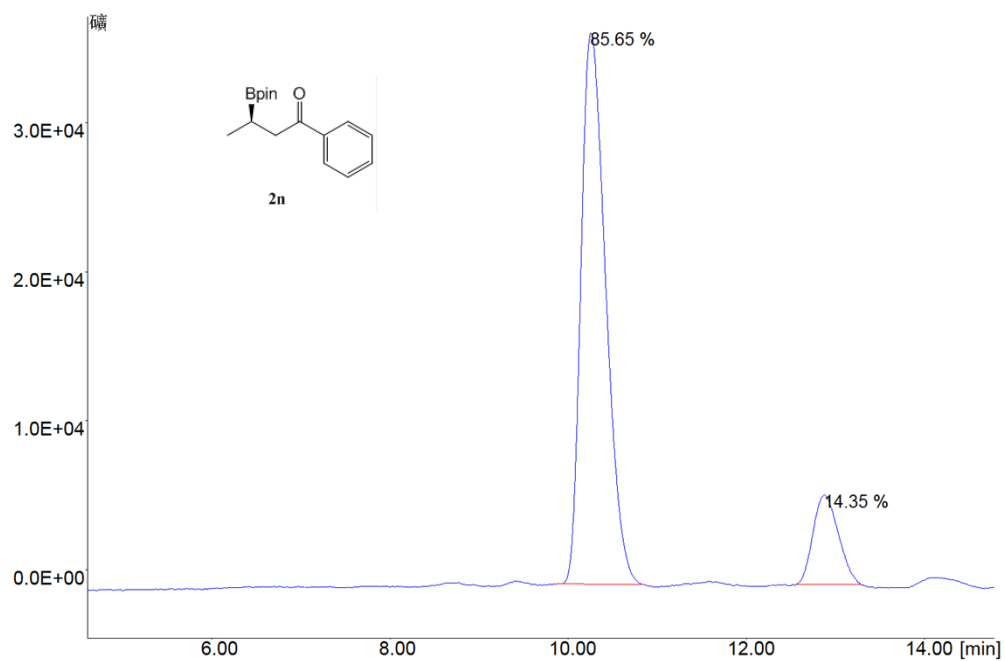

| # | Name | RT     | Height | Area[Sec]  | %Area  |
|---|------|--------|--------|------------|--------|
| 1 |      | 10.253 | 36950  | 699293.341 | 85.647 |
| 2 |      | 12.873 | 5991   | 117192.700 | 14.353 |

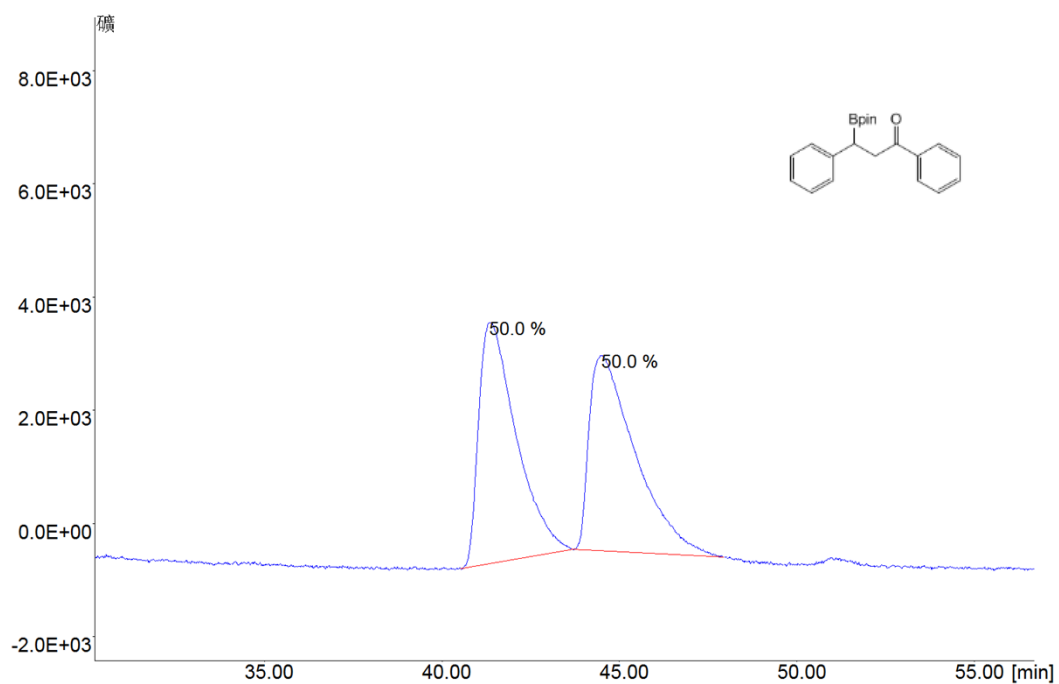

| # | Name | RT     | Height | Area[Sec]  | %Area  |
|---|------|--------|--------|------------|--------|
| 1 |      | 41.357 | 4263   | 309971.587 | 49.994 |
| 2 |      | 44.507 | 3455   | 310042.474 | 50.006 |

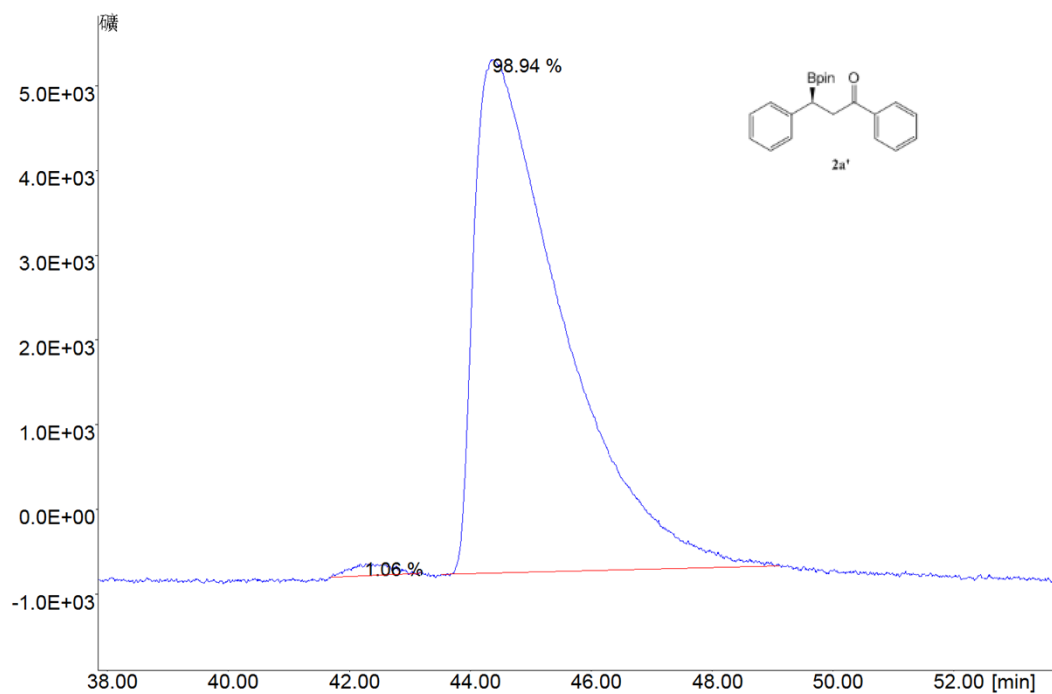

| # | Name | RT     | Height | Area[Sec]  | %Area  |
|---|------|--------|--------|------------|--------|
| 1 |      | 42.267 | 149    | 6555.869   | 1.056  |
| 2 |      | 44.373 | 6067   | 614293.040 | 98.944 |

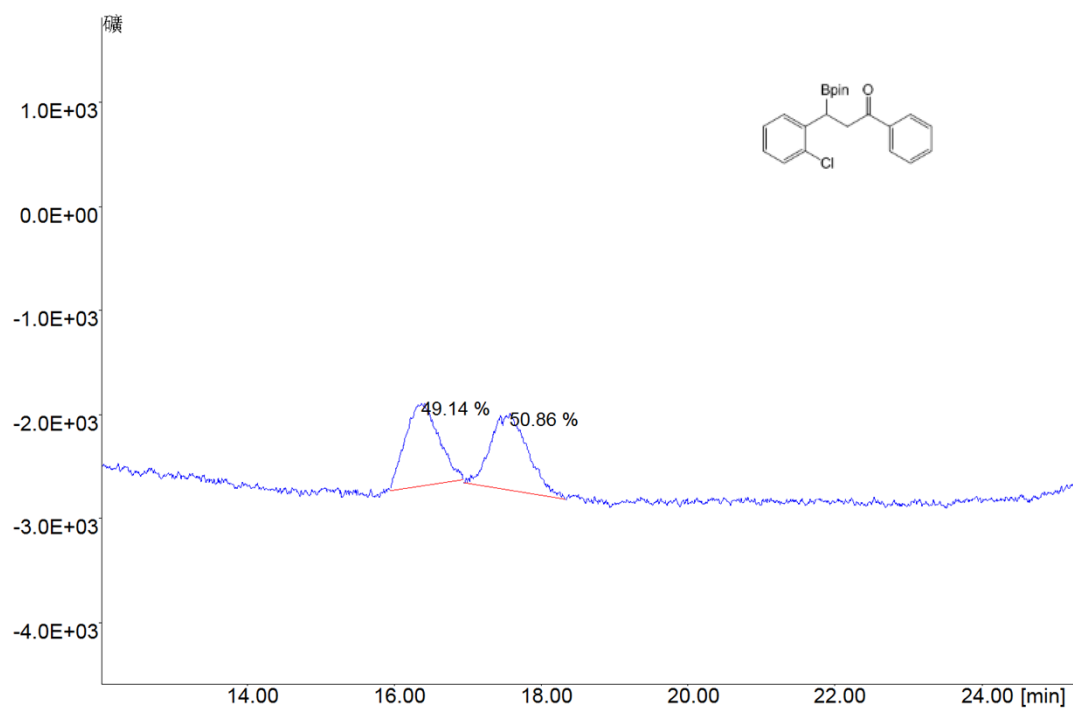

| # | Name | RT     | Height | Area[Sec] | %Area  |
|---|------|--------|--------|-----------|--------|
| 1 |      | 16.373 | 801    | 25131.427 | 49.141 |
| 2 |      | 17.573 | 741    | 26009.922 | 50.859 |

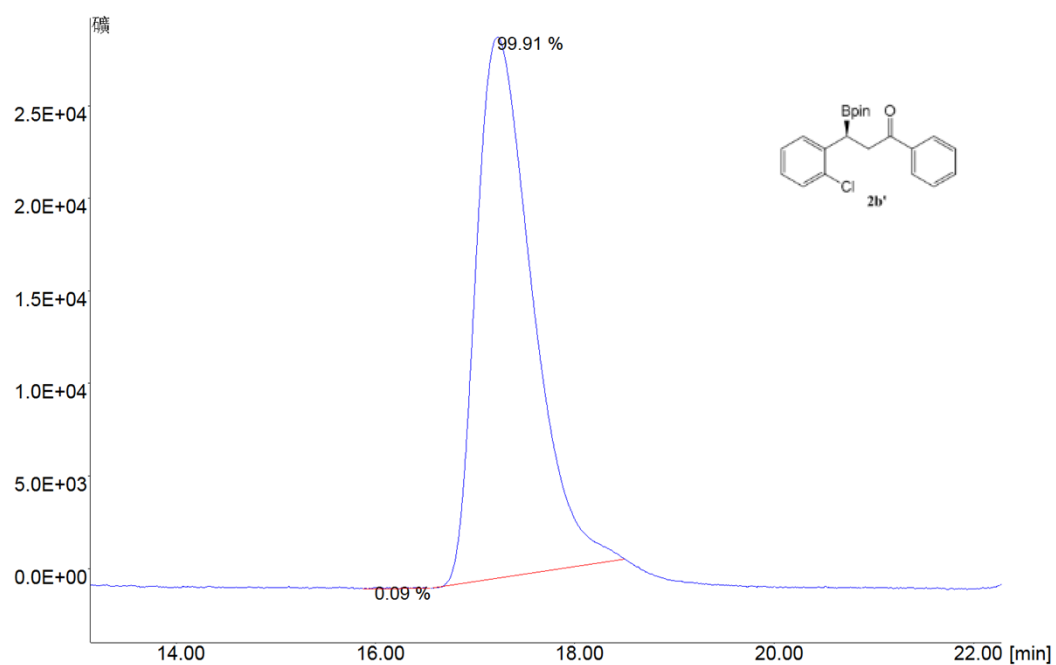

| # | Name | RT     | Height | Area[Sec]   | %Area  |
|---|------|--------|--------|-------------|--------|
| 1 |      | 15.997 | 69     | 1015.032    | 0.089  |
| 2 |      | 17.227 | 29235  | 1134052.492 | 99.911 |

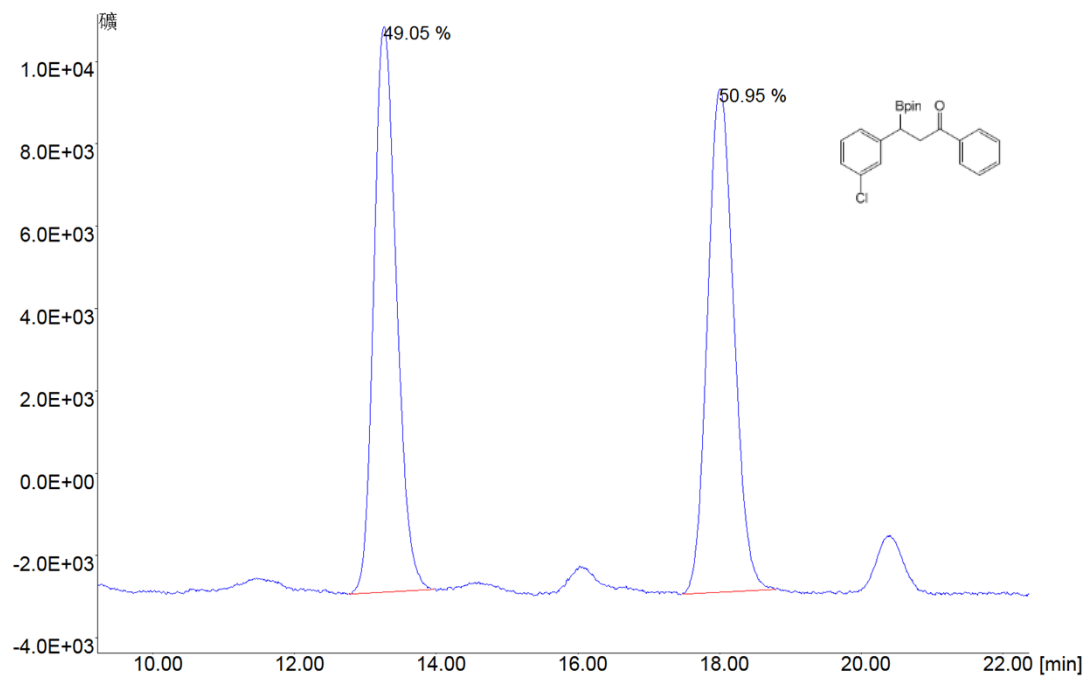

| # | Name | RT     | Height | Area[Sec]  | %Area  |
|---|------|--------|--------|------------|--------|
| 1 |      | 13.263 | 13727  | 300257.618 | 49.048 |
| 2 |      | 18.003 | 12221  | 311908.386 | 50.952 |

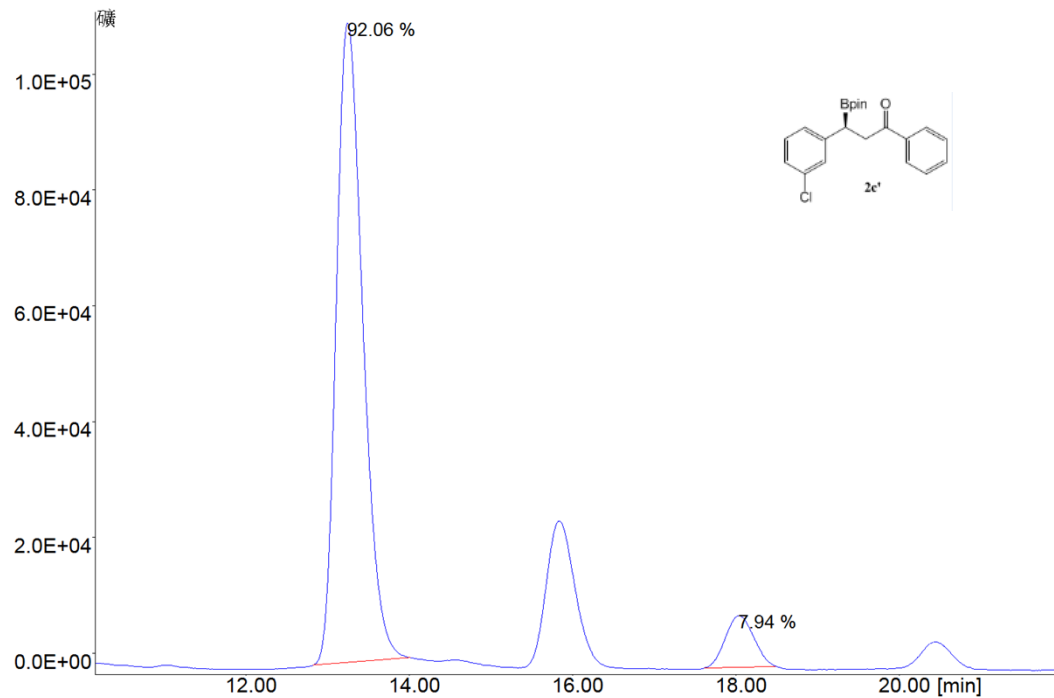

| # | Name | RT     | Height | Area[Sec]   | %Area  |
|---|------|--------|--------|-------------|--------|
| 1 |      | 13.247 | 110359 | 2454691.200 | 92.064 |
| 2 |      | 18.040 | 8867   | 211594.400  | 7.936  |

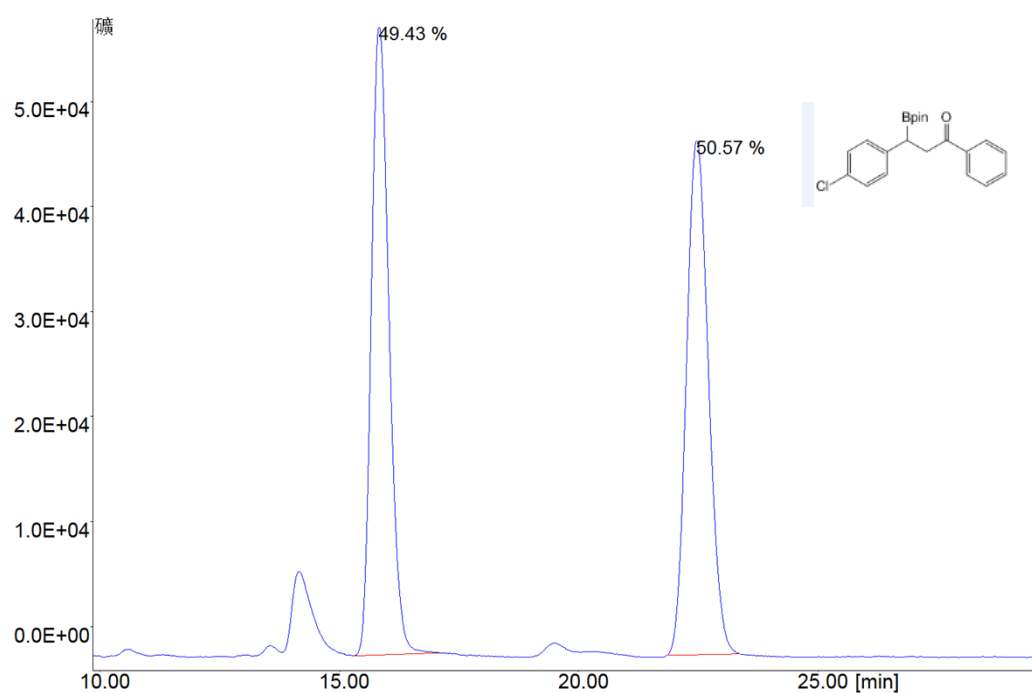

| # | Name | RT     | Height | Area[Sec]   | %Area  |
|---|------|--------|--------|-------------|--------|
| 1 |      | 15.830 | 59759  | 1498430.106 | 49.429 |
| 2 |      | 22.460 | 48919  | 1533060.732 | 50.571 |

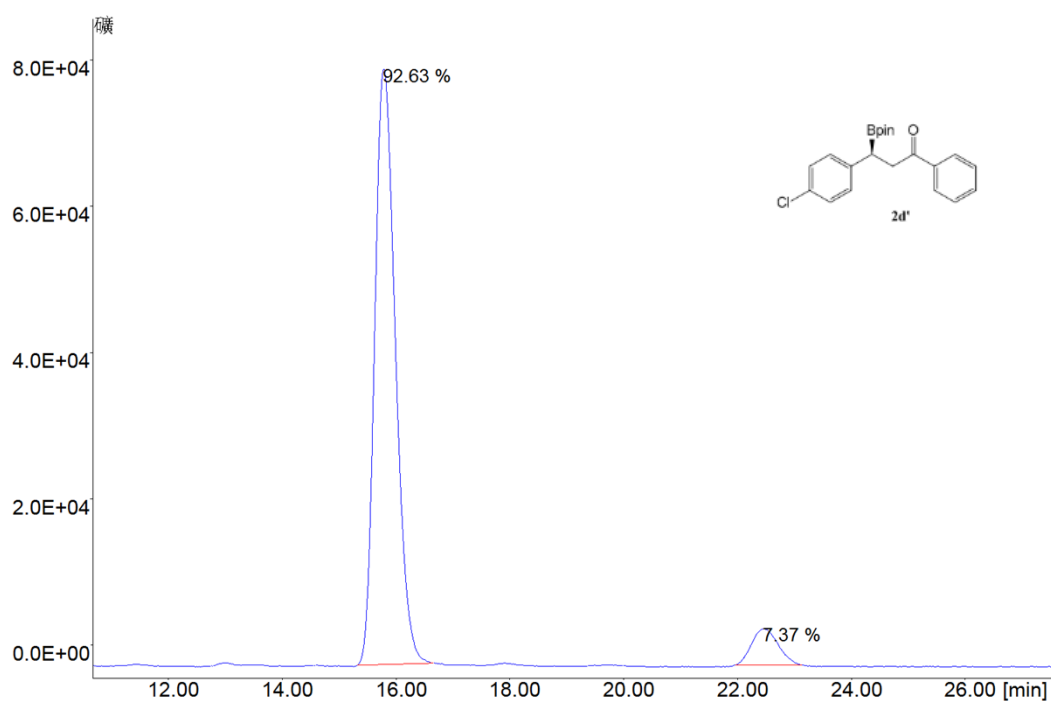

| # | Name | RT     | Height | Area[Sec]   | %Area  |
|---|------|--------|--------|-------------|--------|
| 1 |      | 15.780 | 81331  | 2006990.892 | 92.629 |
| 2 |      | 22.450 | 4962   | 159697.500  | 7.371  |



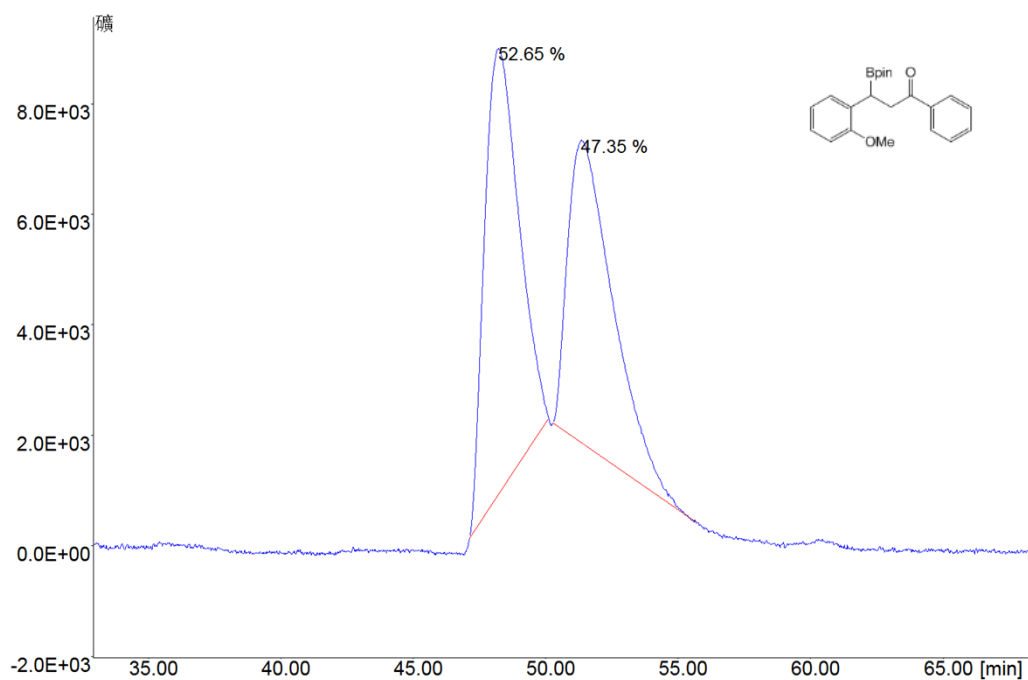

| # | Name | RT     | Height | Area[Sec]  | %Area  |
|---|------|--------|--------|------------|--------|
| 1 |      | 48.207 | 8090   | 722136.400 | 52.654 |
| 2 |      | 51.333 | 5474   | 649344.574 | 47.346 |

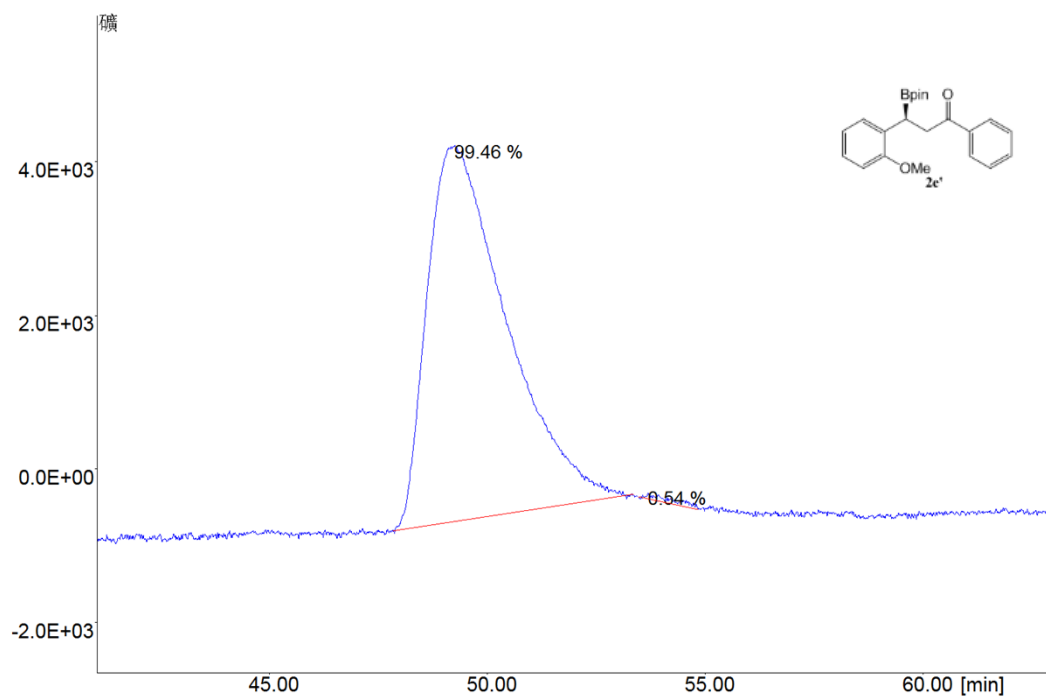

| # | Name | RT     | Height | Area[Sec]  | %Area  |
|---|------|--------|--------|------------|--------|
| 1 |      | 49.250 | 4893   | 614480.374 | 99.457 |
| 2 |      | 53.700 | 82     | 3353.602   | 0.543  |

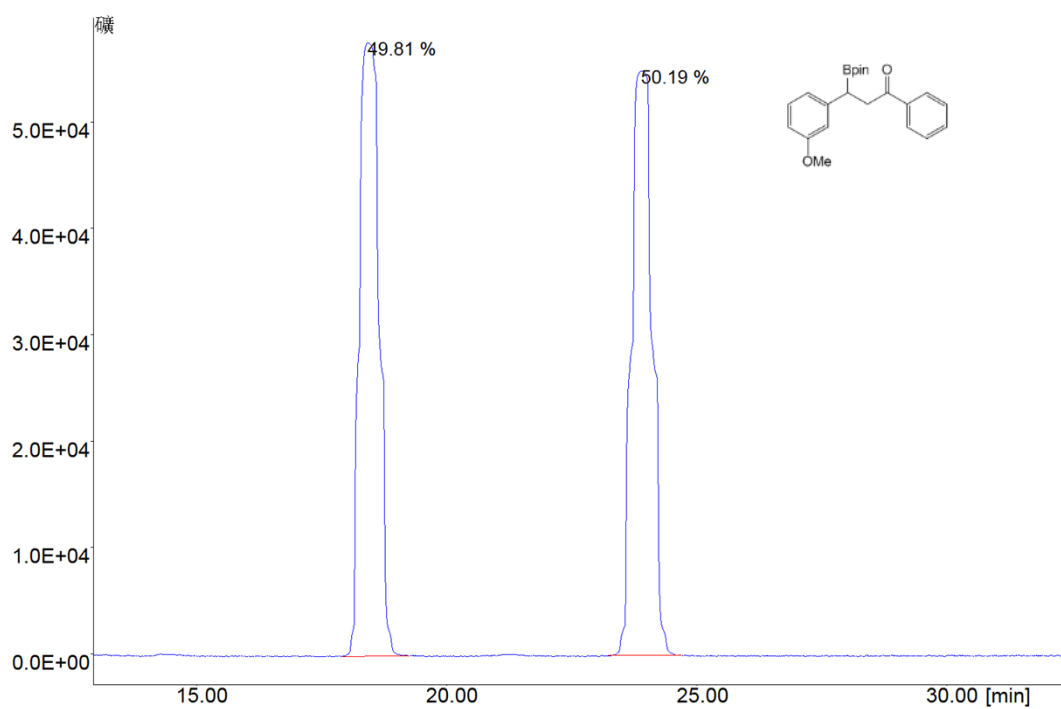

| # | Name | RT     | Height | Area[Sec]   | %Area  |
|---|------|--------|--------|-------------|--------|
| 1 |      | 18.423 | 57700  | 1551762.462 | 49.808 |
| 2 |      | 23.890 | 54967  | 1563739.238 | 50.192 |

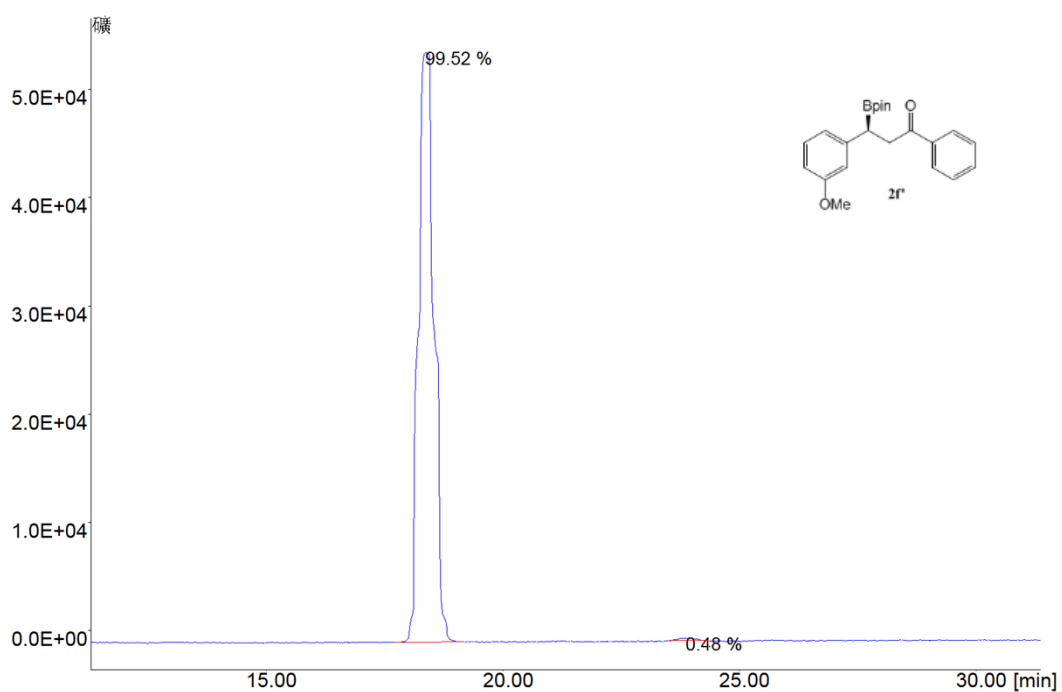

| # | Name | RT     | Height | Area[Sec]   | %Area  |
|---|------|--------|--------|-------------|--------|
| 1 |      | 18.363 | 54503  | 1233430.087 | 99.524 |
| 2 |      | 23.870 | 233    | 5894.583    | 0.476  |

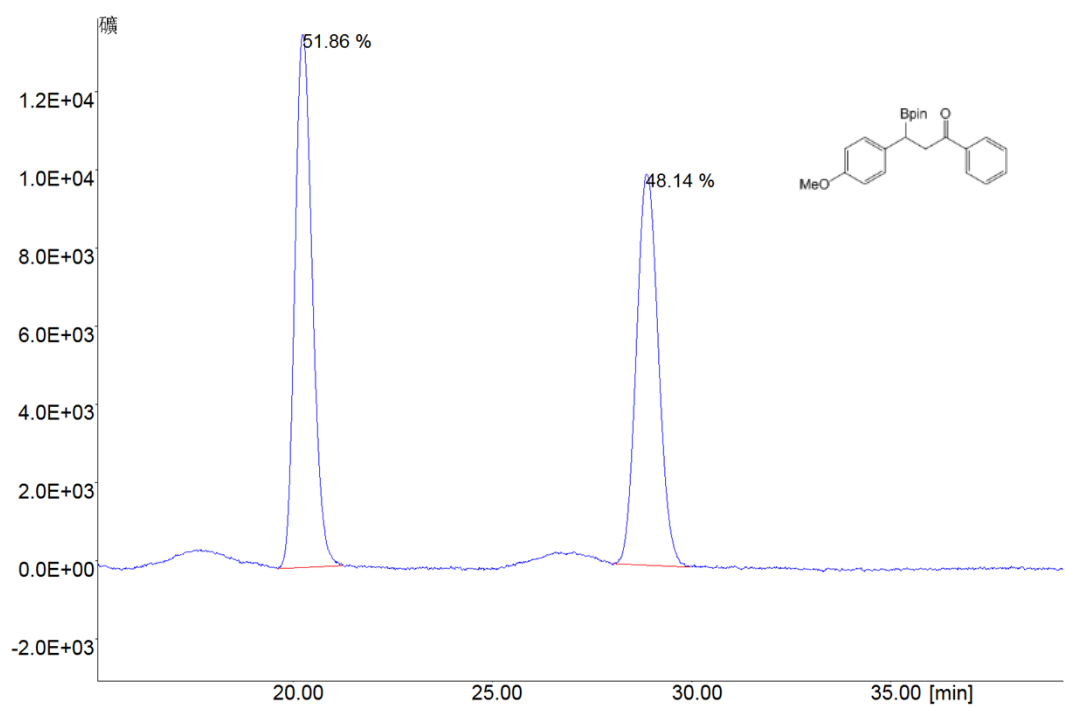

| # | Name | RT     | Height | Area[Sec]  | %Area  |
|---|------|--------|--------|------------|--------|
| 1 |      | 20.237 | 13631  | 405115.200 | 51.859 |
| 2 |      | 28.857 | 9997   | 376067.407 | 48.141 |

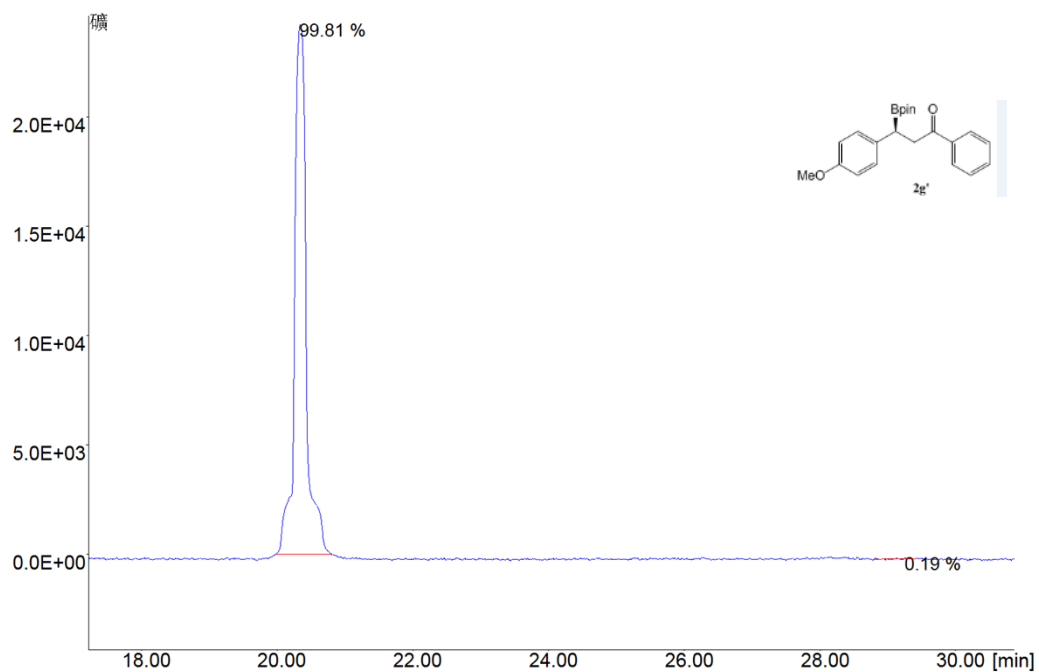

| # | Name | RT     | Height | Area[Sec]  | %Area  |
|---|------|--------|--------|------------|--------|
| 1 |      | 20.333 | 24247  | 281309.927 | 99.806 |
| 2 |      | 29.253 | 66     | 546.409    | 0.194  |

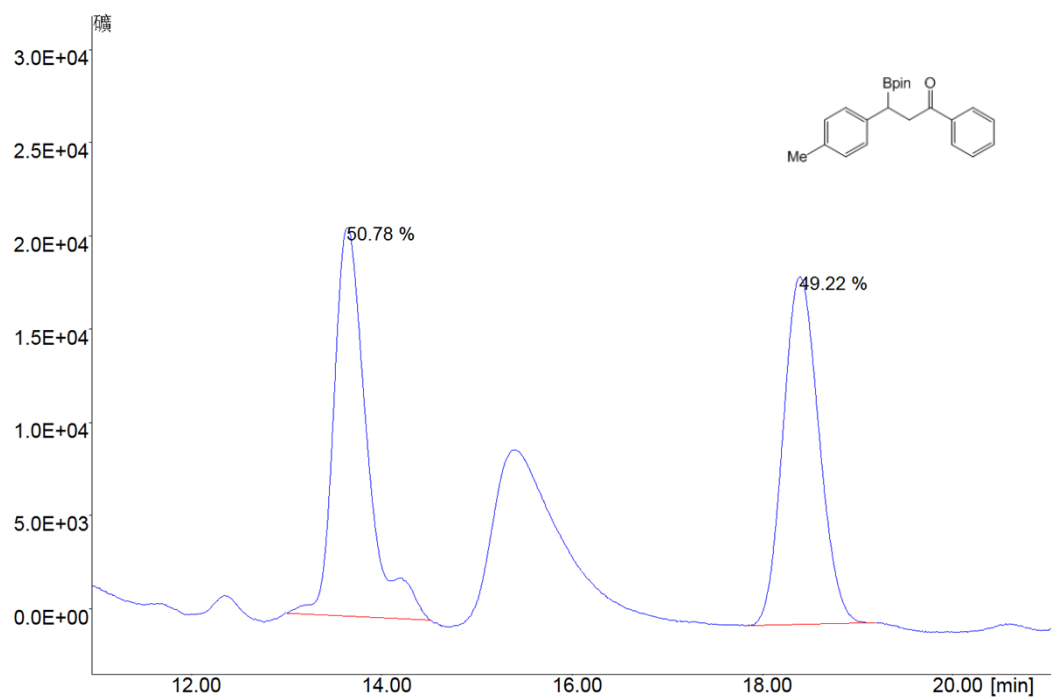

| # | Name | RT     | Height | Area[Sec]  | %Area  |
|---|------|--------|--------|------------|--------|
| 1 |      | 13.637 | 20822  | 496308.897 | 50.778 |
| 2 |      | 18.393 | 18632  | 481093.881 | 49.222 |

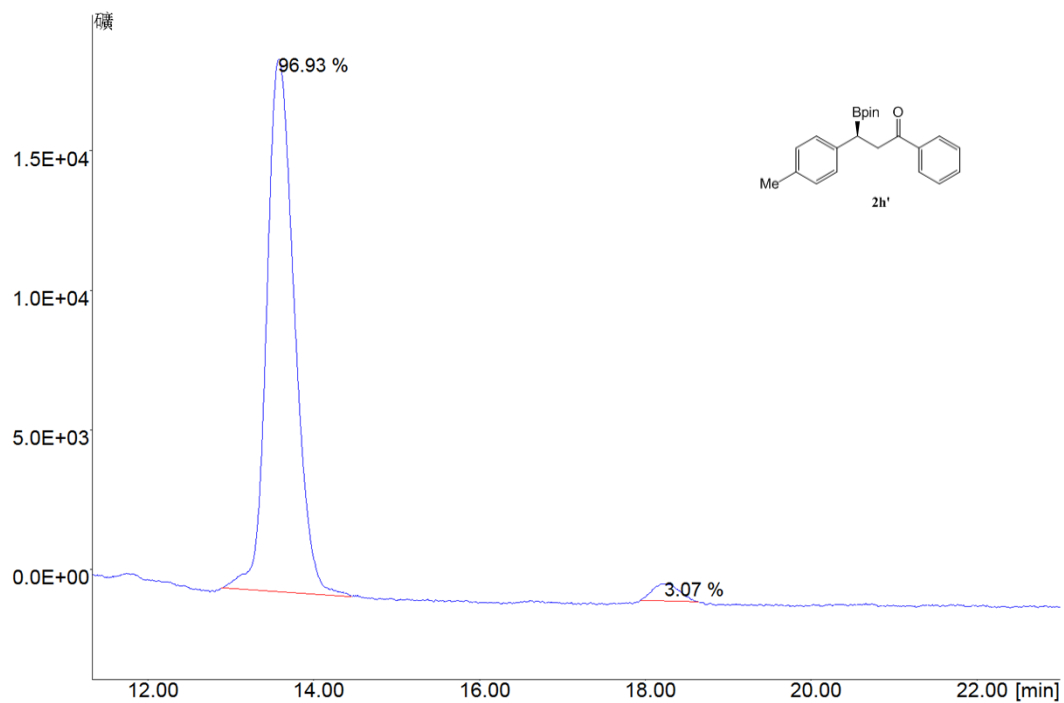

| # | Name | RT     | Height | Area[Sec]  | %Area  |
|---|------|--------|--------|------------|--------|
| 1 |      | 13.580 | 19096  | 435606.610 | 96.925 |
| 2 |      | 18.233 | 625    | 13819.049  | 3.075  |

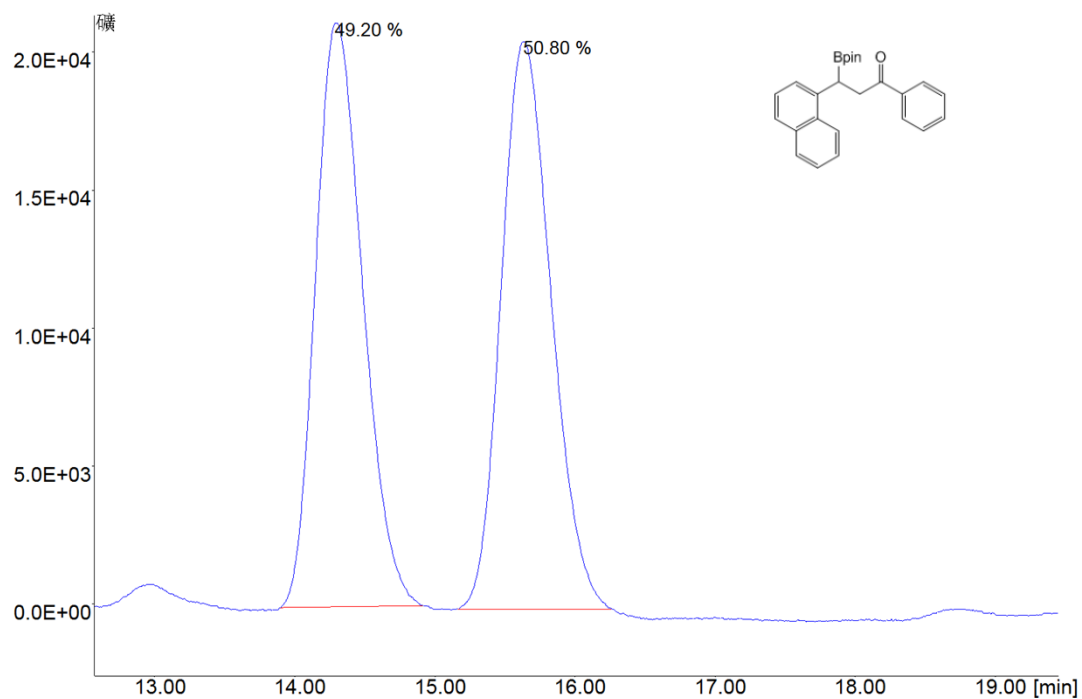

| # | Name | RT     | Height | Area[Sec]  | %Area  |
|---|------|--------|--------|------------|--------|
| 1 |      | 14.290 | 21153  | 490654.851 | 49.196 |
| 2 |      | 15.633 | 20551  | 506682.815 | 50.804 |

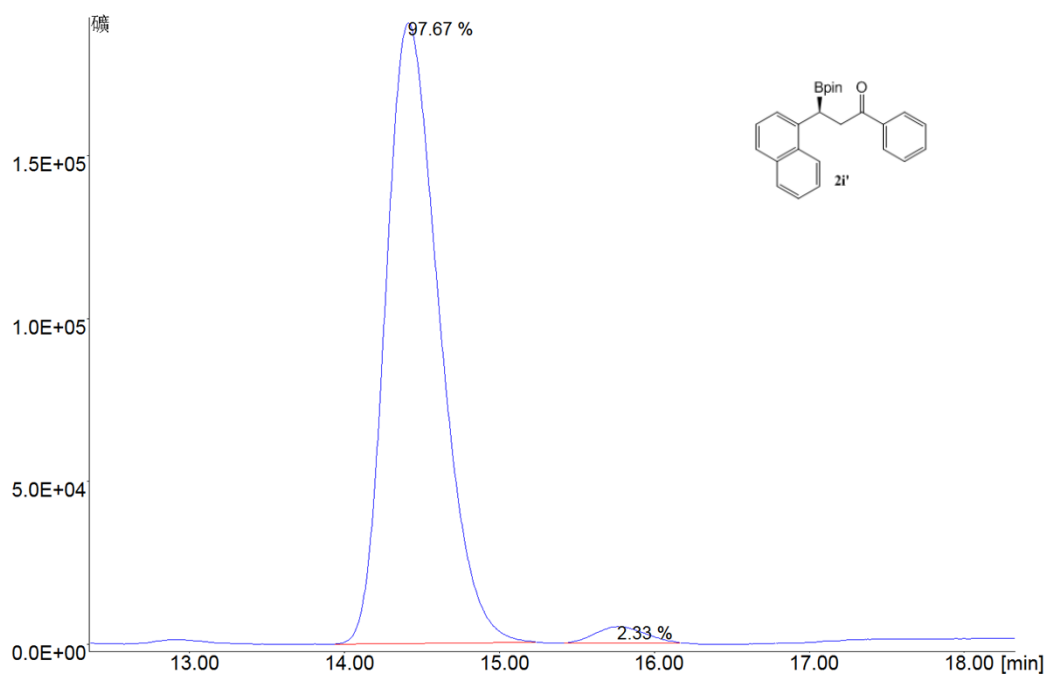

| # | Name | RT     | Height | Area[Sec]   | %Area  |
|---|------|--------|--------|-------------|--------|
| 1 |      | 14.410 | 190693 | 4562421.200 | 97.672 |
| 2 |      | 15.760 | 4960   | 108748.903  | 2.328  |

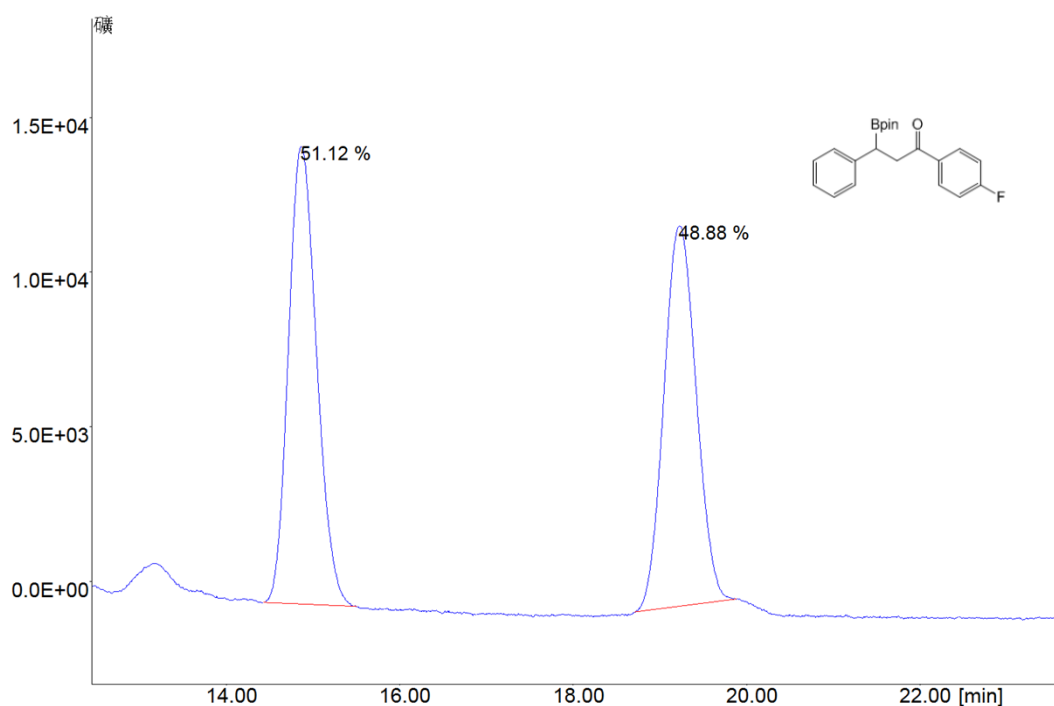

| # | Name | RT     | Height | Area[Sec]  | %Area  |
|---|------|--------|--------|------------|--------|
| 1 |      | 14.860 | 14782  | 328504.904 | 51.121 |
| 2 |      | 19.217 | 12287  | 314099.842 | 48.879 |

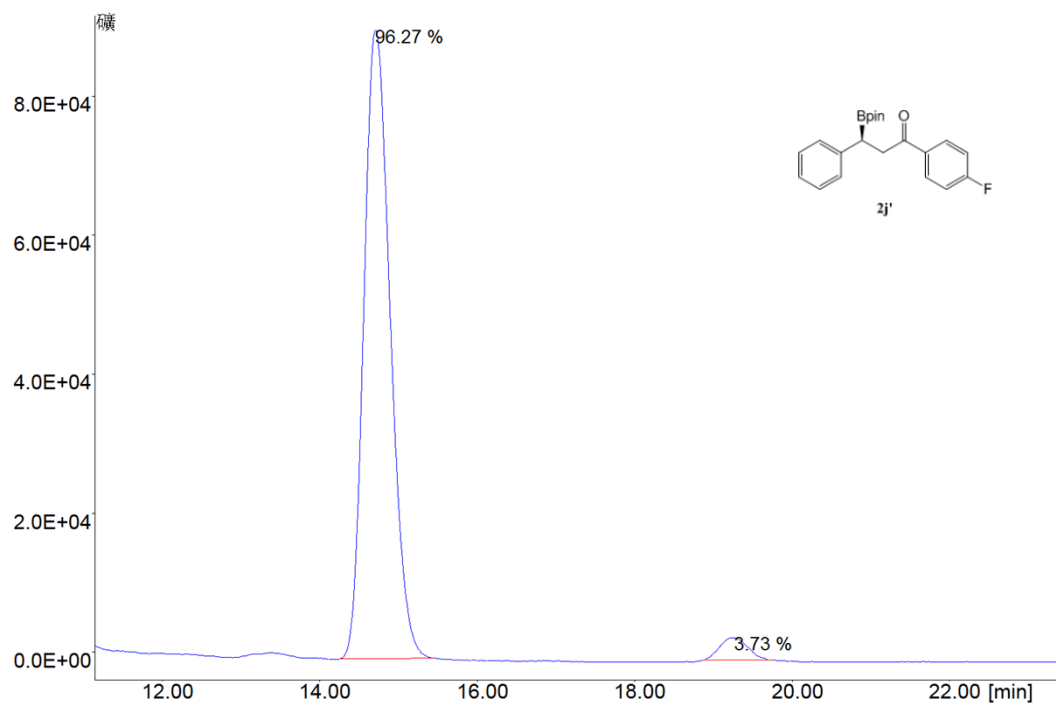

| # | Name | RT     | Height | Area[Sec]   | %Area  |
|---|------|--------|--------|-------------|--------|
| 1 |      | 14.707 | 90393  | 2063812.800 | 96.266 |
| 2 |      | 19.260 | 3255   | 80042.200   | 3.734  |

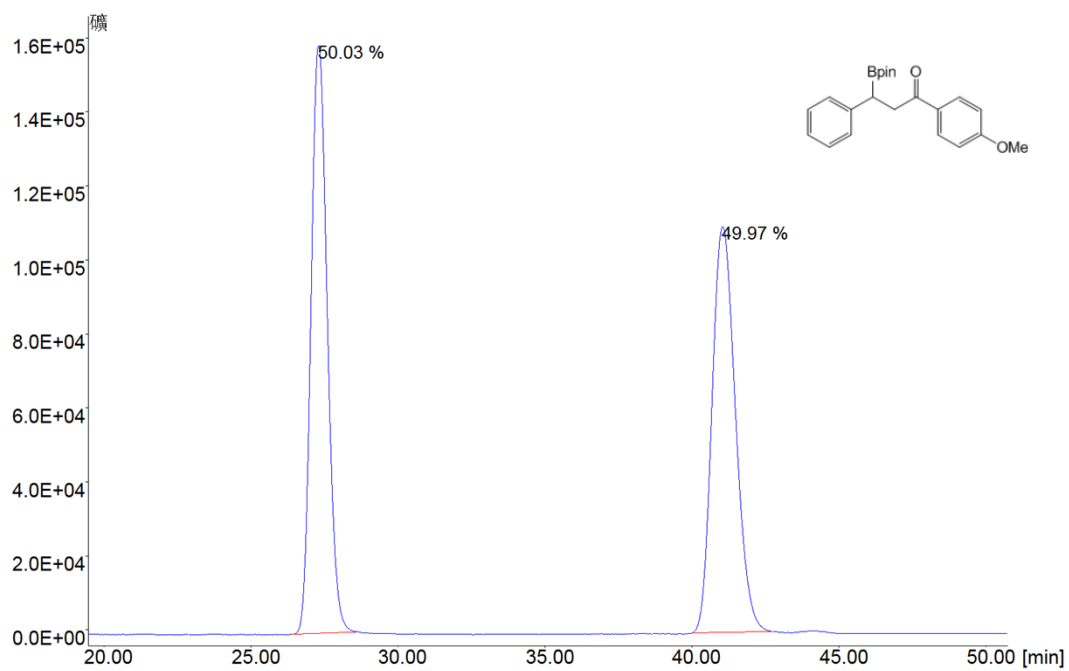

| # | Name | RT     | Height | Area[Sec]   | %Area  |
|---|------|--------|--------|-------------|--------|
| 1 |      | 27.293 | 158984 | 5953097.153 | 50.026 |
| 2 |      | 41.030 | 109644 | 5946795.439 | 49.974 |

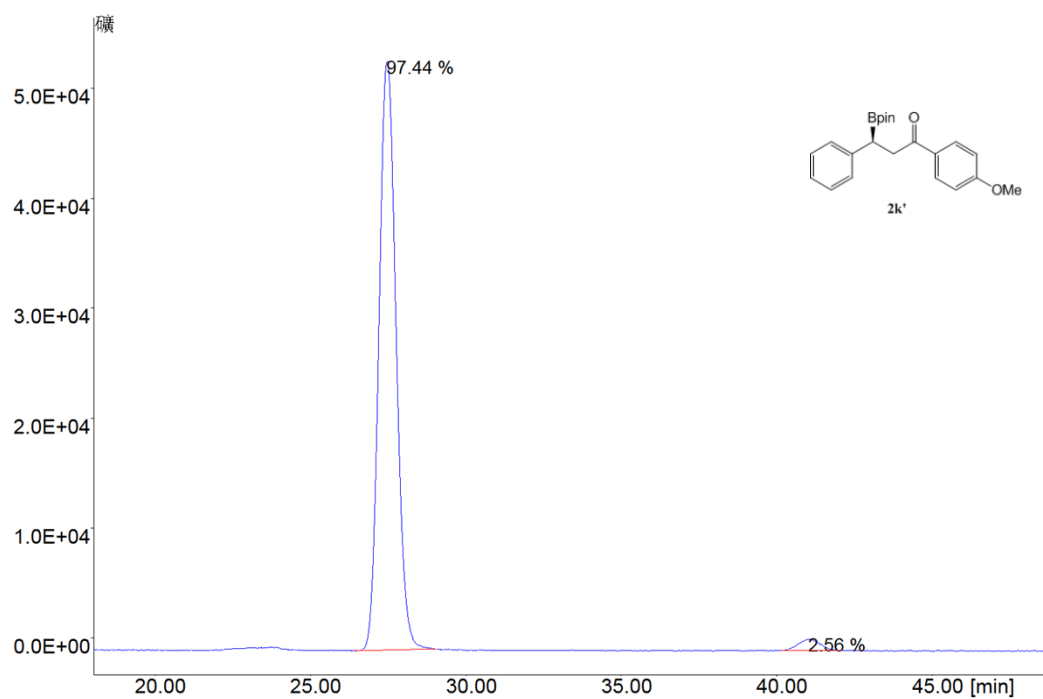

| # | Name | RT     | Height | Area[Sec]   | %Area  |
|---|------|--------|--------|-------------|--------|
| 1 |      | 27.460 | 53525  | 1991170.183 | 97.439 |
| 2 |      | 41.033 | 1077   | 52340.400   | 2.561  |

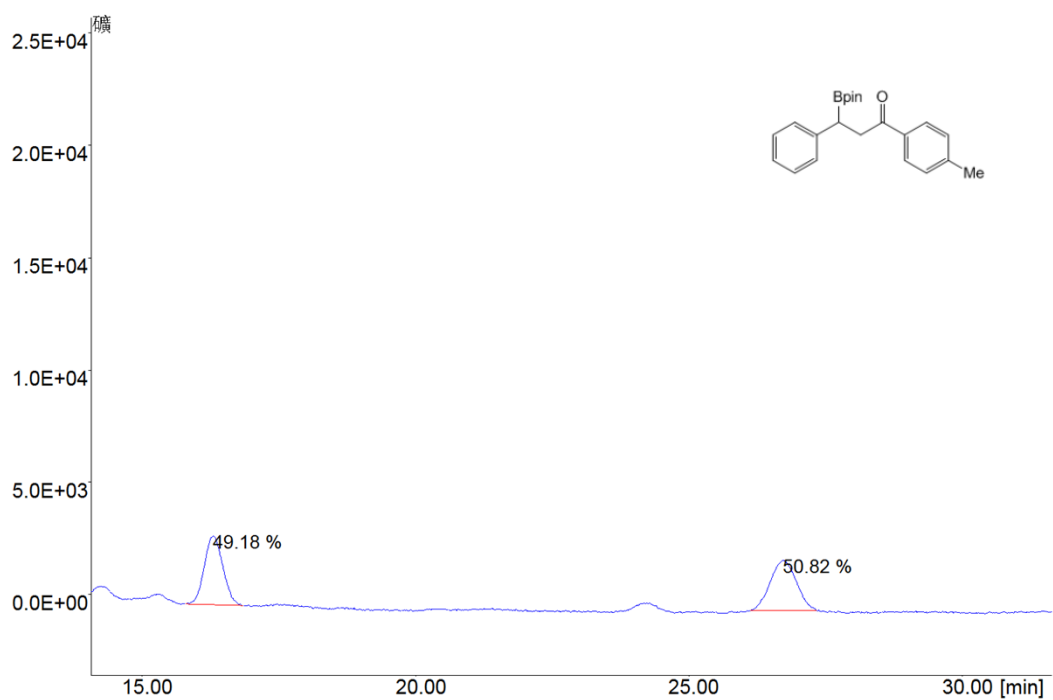

| # | Name | RT     | Height | Area[Sec] | %Area  |
|---|------|--------|--------|-----------|--------|
| 1 |      | 16.297 | 3055   | 70903.448 | 49.179 |
| 2 |      | 26.733 | 2225   | 73269.800 | 50.821 |

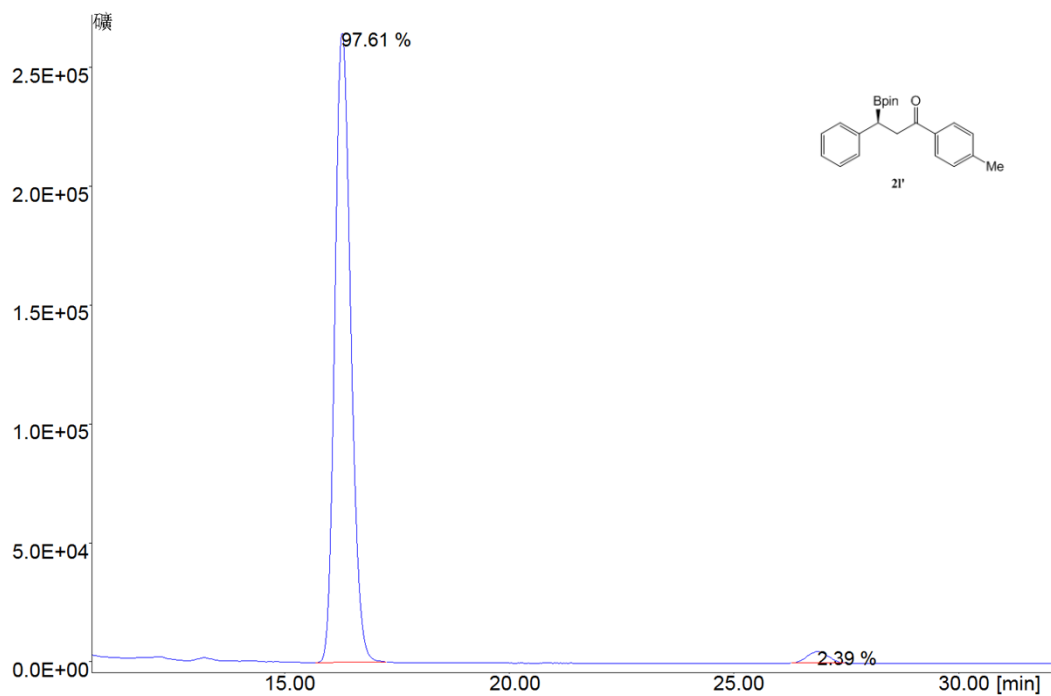

| # | Name | RT     | Height | Area[Sec]   | %Area  |
|---|------|--------|--------|-------------|--------|
| 1 |      | 16.277 | 264559 | 6376590.417 | 97.607 |
| 2 |      | 26.860 | 4805   | 156313.377  | 2.393  |



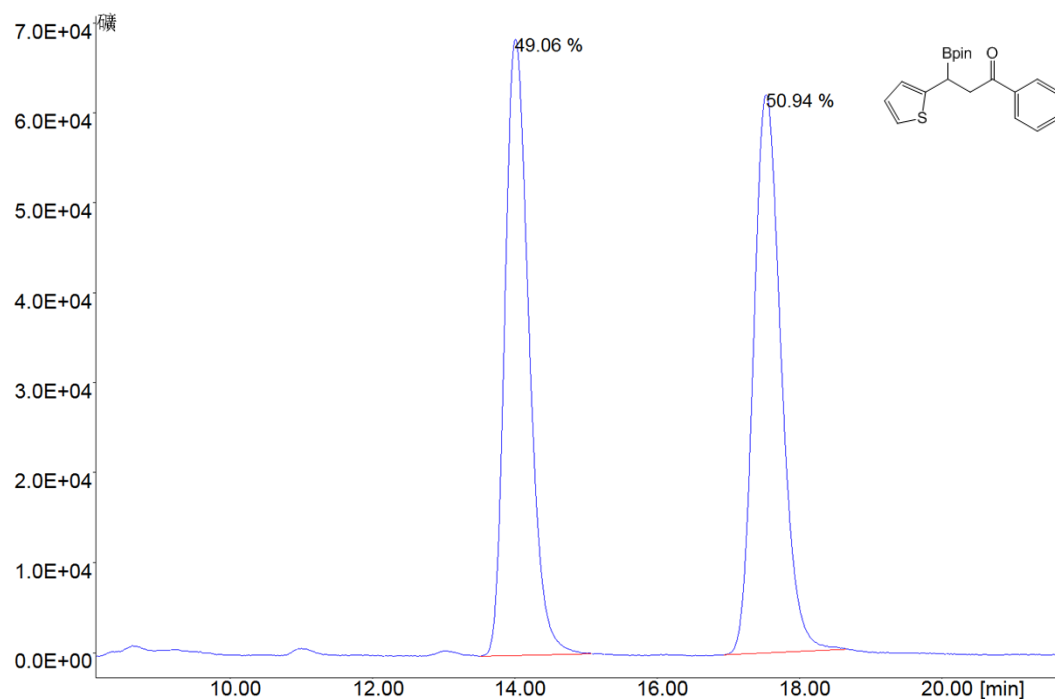

| # | Name | RT     | Height | Area[Sec]   | %Area  |
|---|------|--------|--------|-------------|--------|
| 1 |      | 14.003 | 68473  | 1581469.262 | 49.065 |
| 2 |      | 17.527 | 62044  | 1641754.982 | 50.935 |

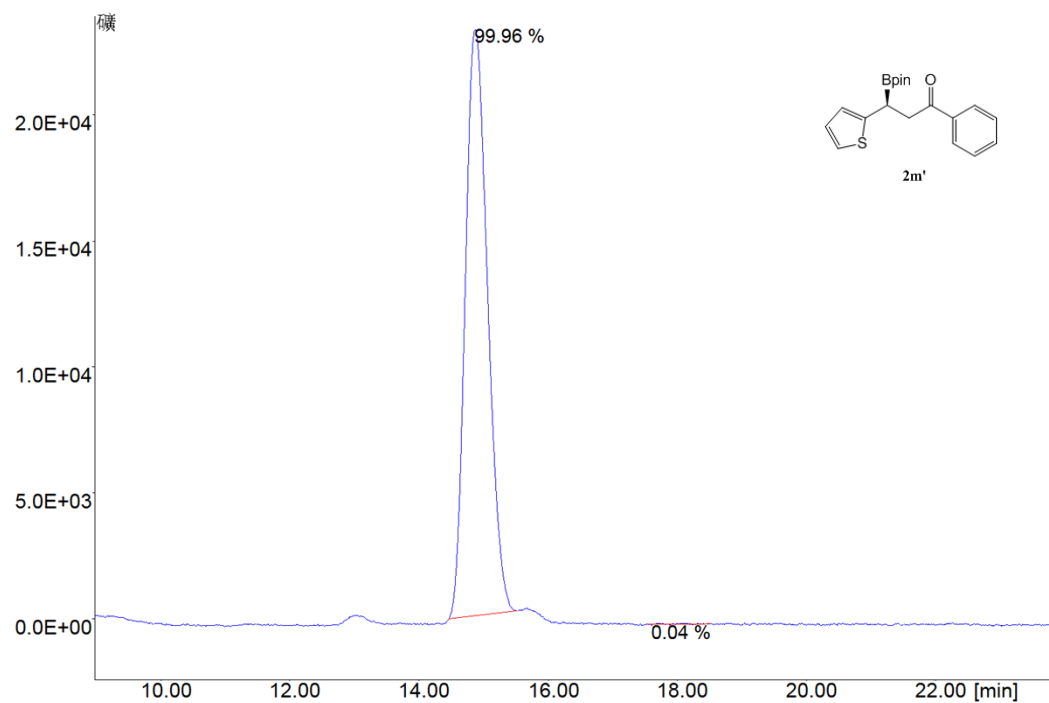

| # | Name | RT     | Height | Area[Sec]  | %Area  |
|---|------|--------|--------|------------|--------|
| 1 |      | 14.867 | 23282  | 546904.575 | 99.957 |
| 2 |      | 17.600 | 52     | 236.801    | 0.043  |

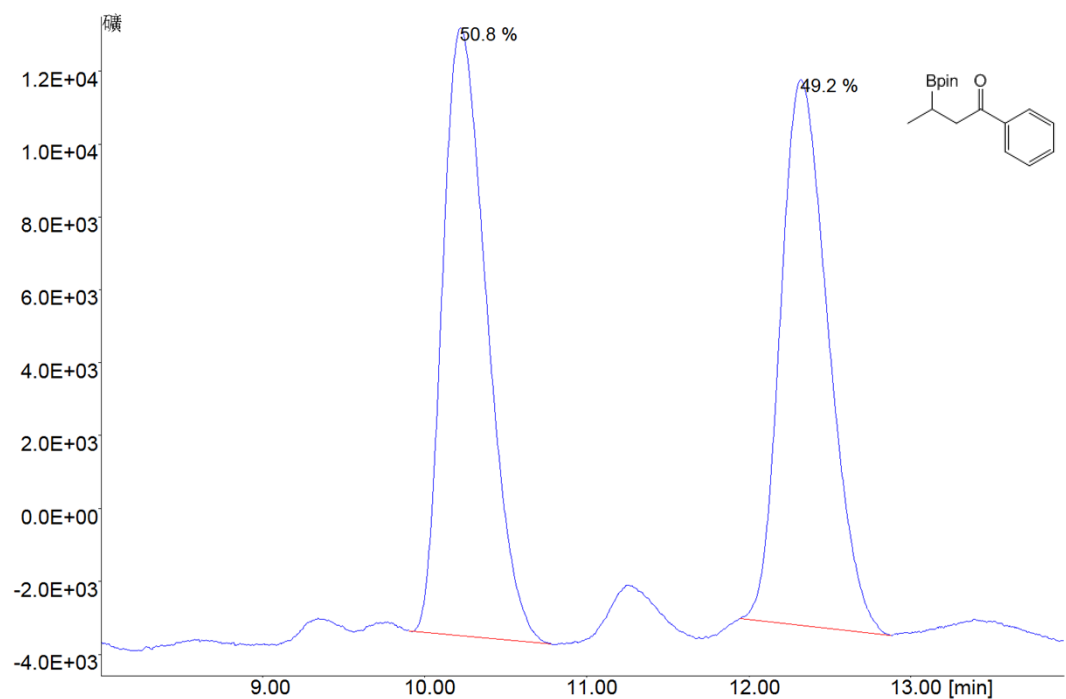

| # | Name | RT     | Height | Area[Sec]  | %Area  |
|---|------|--------|--------|------------|--------|
| 1 |      | 10.223 | 16669  | 316211.435 | 50.757 |
| 2 |      | 12.320 | 14976  | 306777.389 | 49.243 |

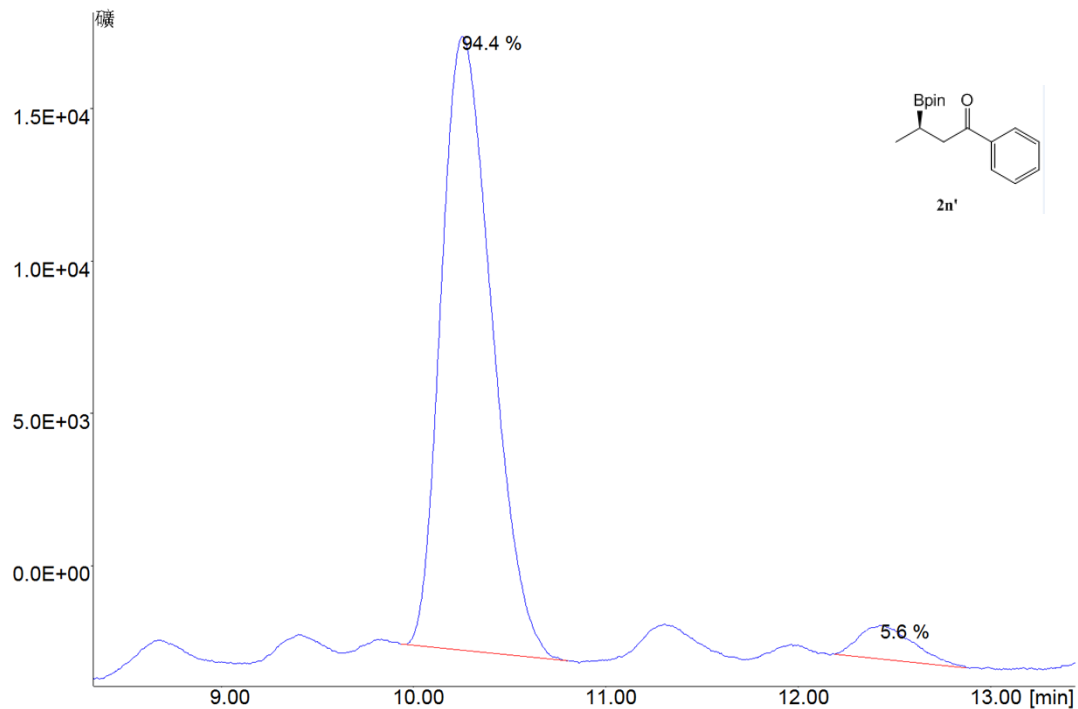

| # | Name | RT     | Height | Area[Sec]  | %Area  |
|---|------|--------|--------|------------|--------|
| 1 |      | 10.253 | 20125  | 369171.385 | 94.421 |
| 2 |      | 12.430 | 1097   | 21811.600  | 5.579  |

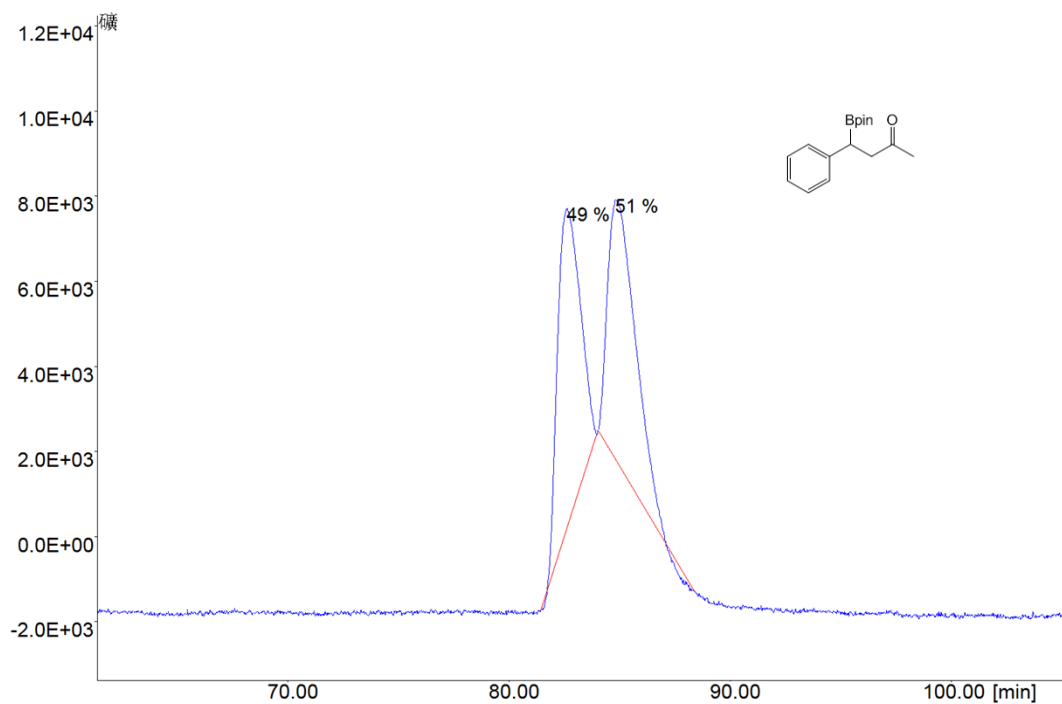

| # | Name | RT     | Height [礦] | Area [礦.Sec] | %Area  |
|---|------|--------|------------|--------------|--------|
| 1 |      | 82.617 | 7495       | 526300.475   | 49.225 |
| 2 |      | 84.813 | 6096       | 542868.024   | 50.775 |

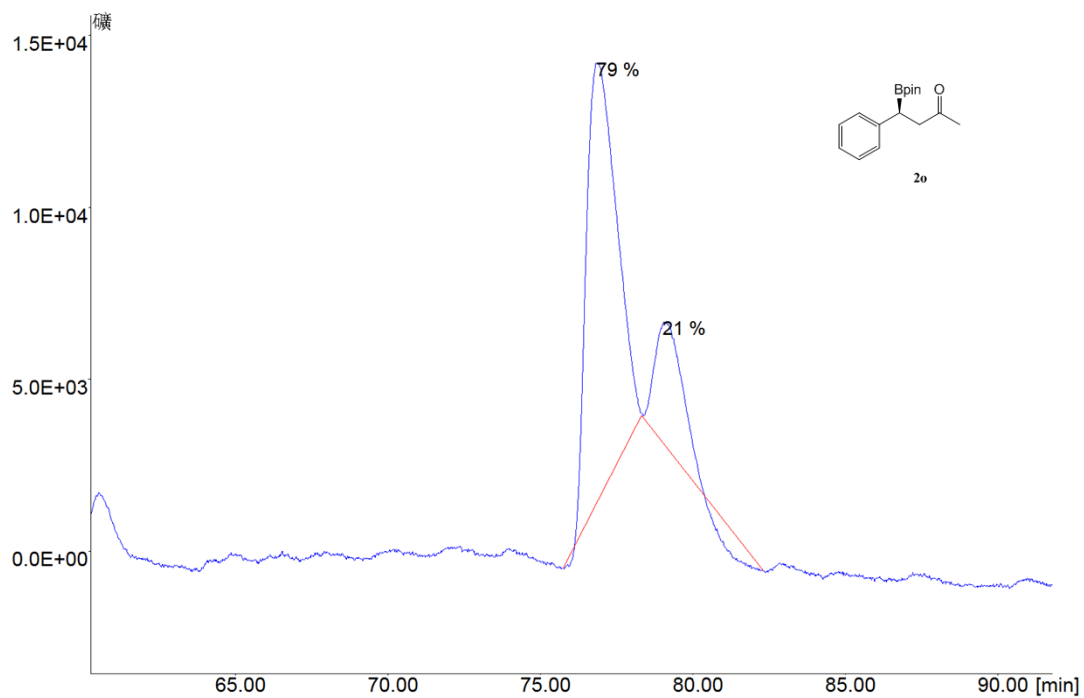

| # | Name | RT     | Height [礦] | Area [礦.Sec] | %Area  |
|---|------|--------|------------|--------------|--------|
| 1 |      | 76.867 | 12776      | 863841.393   | 78.863 |
| 2 |      | 79.037 | 3537       | 231530.939   | 21.137 |

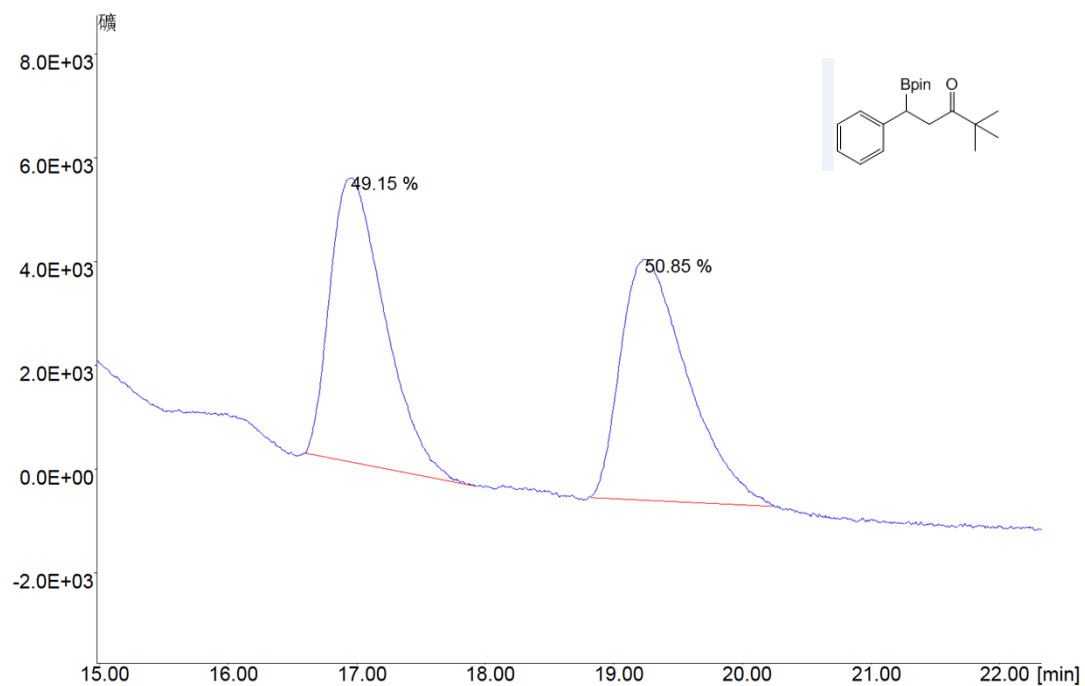

| # | Name | RT     | Height | Area[Sec]  | %Area  |
|---|------|--------|--------|------------|--------|
| 1 |      | 16.957 | 5479   | 161188.094 | 49.152 |
| 2 |      | 19.243 | 4638   | 166749.800 | 50.848 |

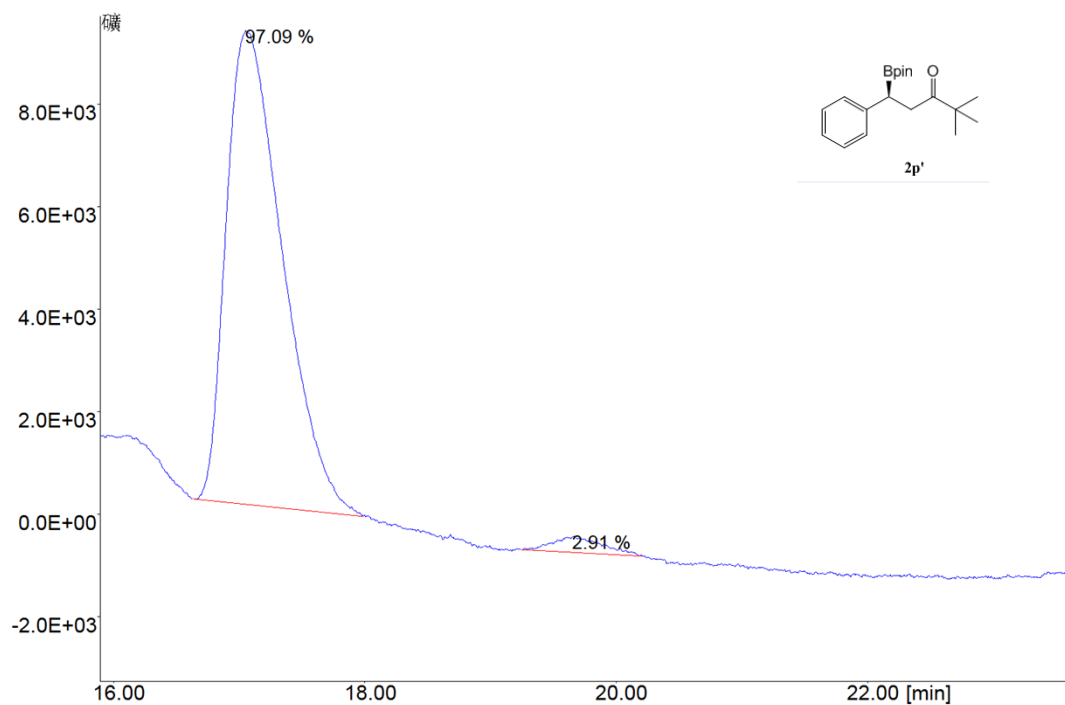

| # | Name | RT     | Height | Area[Sec]  | %Area  |
|---|------|--------|--------|------------|--------|
| 1 |      | 17.050 | 9239   | 285359.839 | 97.093 |
| 2 |      | 19.653 | 318    | 8544.725   | 2.907  |
